# Supplementary material for: New marine-derived indolymethyl pyrazinoquinazoline alkaloids with promising antimicrobial profiles
Source: Royal Society of Chemistry journal article supplement (doi:10.1039/d0ra05319h), 2020-01-01
Supplement: d0ra05319h1.pdf [file d0ra05319h1.pdf]

## Supplementary information

# New Marine-Derived Indolymethyl Pyrazinoquinazoline Alkaloids with Promising Antimicrobial Profiles

*Solida Long<sup>a</sup>, Diana I. S. P. Resende<sup>a,b</sup>, Andreia Palmeira<sup>a,b</sup>, Anake Kijjoa<sup>b,c</sup>, Artur M. S. Silva<sup>d</sup>,  
Maria Elizabeth Tiritan<sup>a,b,e</sup>, Patrícia Pereira-Terra<sup>b,c</sup>, Joana Freitas-Silva<sup>b,c</sup>, Sandra Barreiro<sup>f</sup>,  
Renata Silva<sup>f</sup>, Fernando Remião<sup>f</sup>, Eugénia Pinto<sup>b,g</sup>, Paulo Martins da Costa<sup>b,c\*</sup>, Emília Sousa<sup>a,b\*</sup>,  
and Madalena M. M. Pinto<sup>a,b</sup>*

<sup>a</sup>LQOF - Laboratório de Química Orgânica e Farmacêutica, Departamento de Ciências Químicas, Faculdade de Farmácia, Universidade do Porto, Rua de Jorge Viterbo Ferreira, 228, 4050-313 Porto, Portugal;

<sup>b</sup>CIIMAR - Centro Interdisciplinar de Investigação Marinha e Ambiental, Terminal de Cruzeiros do Porto de Leixões, Av. General Norton de Matos S/N, 4450-208 Matosinhos, Portugal;

<sup>c</sup>ICBAS - Instituto de Ciências Biomédicas Abel Salazar, Universidade do Porto, Rua de Jorge Viterbo Ferreira, 228, 4050-313 Porto, Portugal;

<sup>d</sup>QOPNA - Química Orgânica, Produtos Naturais e Agroalimentares, Departamento de Química, Universidade de Aveiro, 3810-193 Aveiro, Portugal;

<sup>e</sup>CESPU, Instituto de Investigação e Formação Avançada em Ciências e Tecnologias da Saúde (IINFACETS), Rua Central de Gandra, 1317, 4585-116 Gandra PRD, Portugal;

<sup>f</sup>UCIBIO-REQUIMTE, Laboratório de Toxicologia, Departamento de Ciências Biológicas, Faculdade de Farmácia, Universidade do Porto, Rua de Jorge Viterbo Ferreira, 228, 4050-313 Porto, Portugal;

<sup>g</sup>Laboratório de Microbiologia, Departamento de Ciências Biológicas, Faculdade de Farmácia, Universidade do Porto, Rua de Jorge Viterbo Ferreira, 228, 4050-313 Porto, Portugal

\*Corresponding authors: [esousa@ff.up.pt](mailto:esousa@ff.up.pt), [pmcosta@icbas.up.pt](mailto:pmcosta@icbas.up.pt)

## Contents

|                                                                                        |    |
|----------------------------------------------------------------------------------------|----|
| 1. NMR Spectra.....                                                                    | 2  |
| 2. Enantioselective liquid chromatography.....                                         | 19 |
| 2.1 Chiral analysis of compounds 22-32.....                                            | 19 |
| 2.2 Enantioselective liquid chromatography separation of compounds 22, 23, and 26..... | 24 |
| 3. High resolution mass spectra.....                                                   | 26 |
| 4. Antimicrobial activity.....                                                         | 32 |

# 1. NMR Spectra

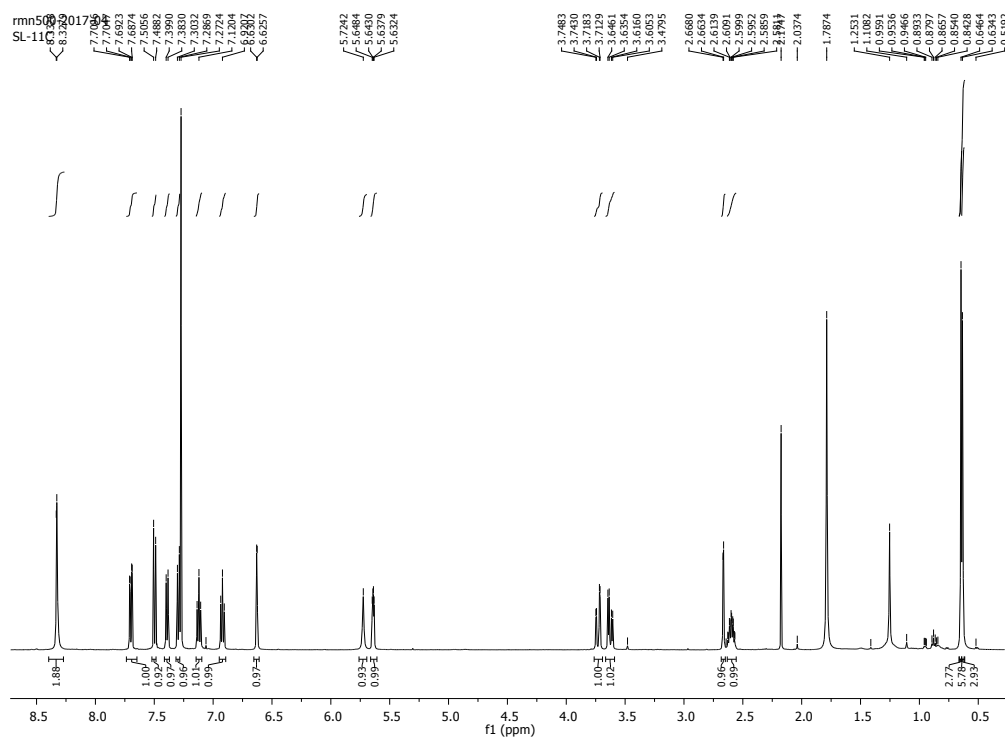

**Fig. S1.**  $^1\text{H}$  NMR spectrum of (1*S*,4*R*)-4-((1*H*-indol-3-yl)methyl)-8-chloro-1-isopropyl-1,2-dihydro-6*H*-pyrazino[2,1-*b*]quinazoline-3,6(4*H*)-dione (**22**) ( $\text{CDCl}_3$ , 300, MHz).

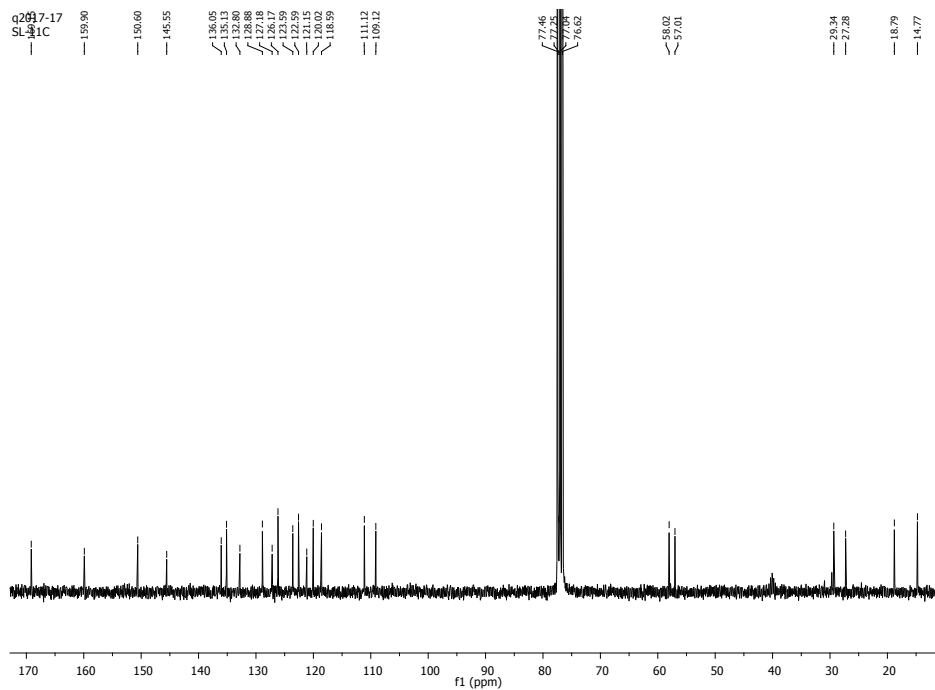

**Fig. S2.**  $^{13}\text{C}$  NMR spectrum of (1*S*,4*R*)-4-((1*H*-indol-3-yl)methyl)-8-chloro-1-isopropyl-1,2-dihydro-6*H*-pyrazino[2,1-*b*]quinazoline-3,6(4*H*)-dione (**22**) ( $\text{CDCl}_3$ , 75, MHz).

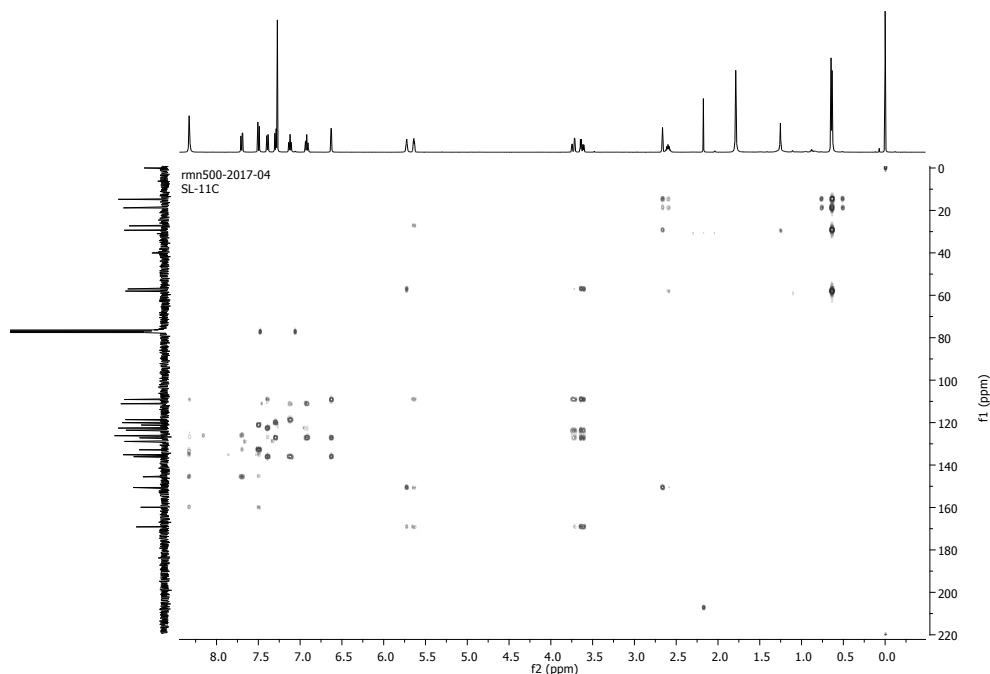

**Fig. S3.**  $^1\text{H}$  NMR spectrum of (1*S*,4*R*)-4-((1*H*-indol-3-yl)methyl)-8-chloro-1-isopropyl-1,2-dihydro-6*H*-pyrazino[2,1-*b*]quinazoline-3,6(4*H*)-dione (**22**) ( $\text{CDCl}_3$ , 300, MHz).

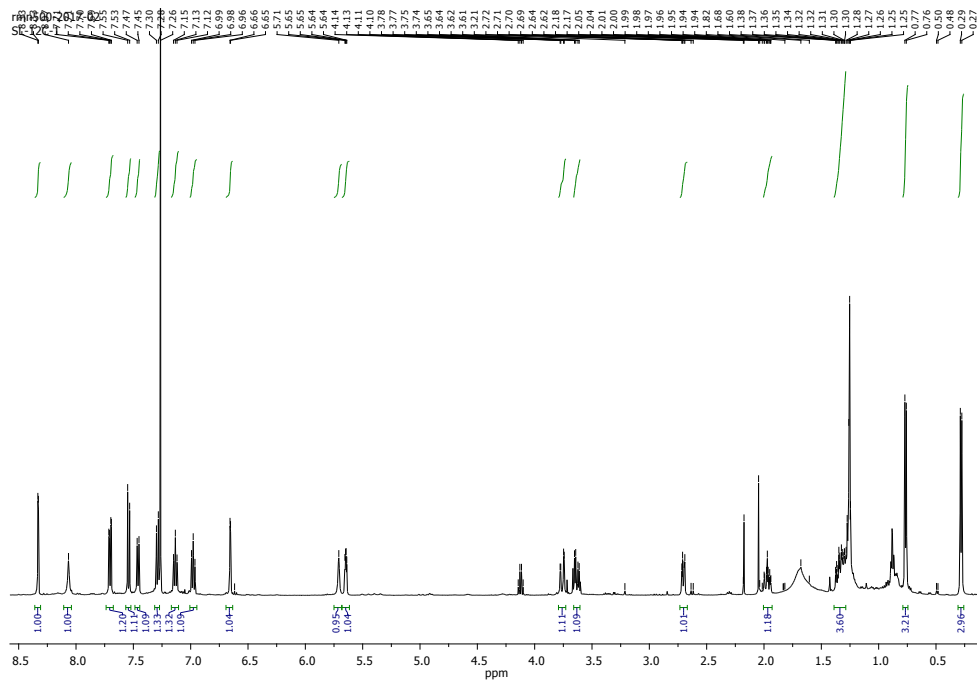

**Fig. S4.**  $^1\text{H}$  NMR spectrum of (1*S*,4*R*)-4-((1*H*-indol-3-yl)methyl)-8-chloro-1-isobutyl-1,2-dihydro-6*H*-pyrazino[2,1-*b*]quinazoline-3,6(4*H*)-dione (**23**) ( $\text{CDCl}_3$ , 300, MHz).

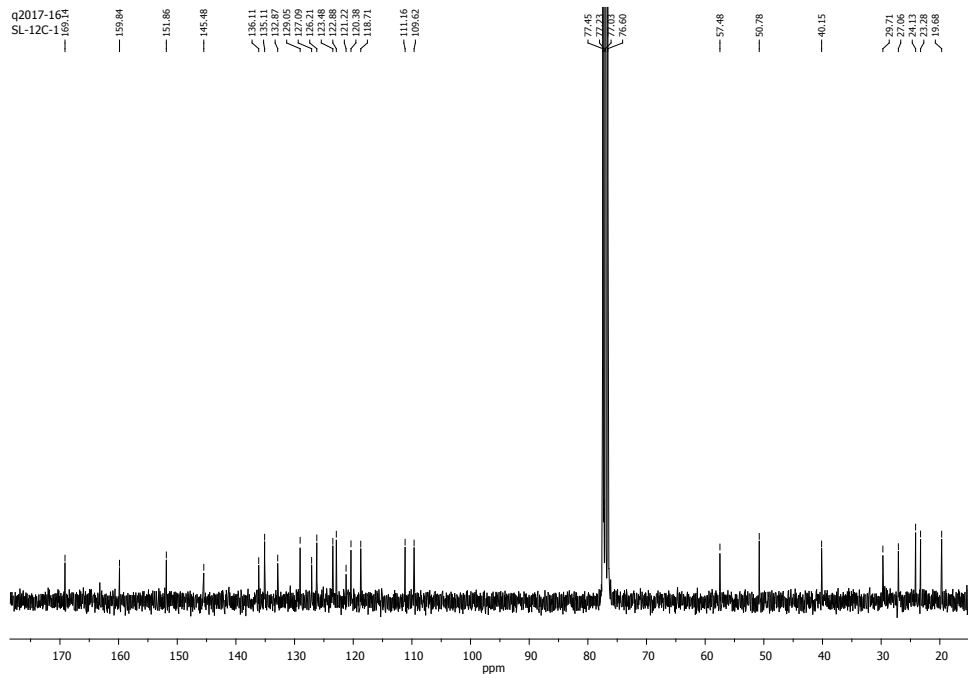

**Fig. S5.**  $^{13}\text{C}$  NMR spectrum of (1*S*,4*R*)-4-((1*H*-indol-3-yl)methyl)-8-chloro-1-isobutyl-1,2-dihydro-6*H*-pyrazino[2,1-*b*]quinazoline-3,6(4*H*)-dione (**23**) ( $\text{CDCl}_3$ , 75, MHz).

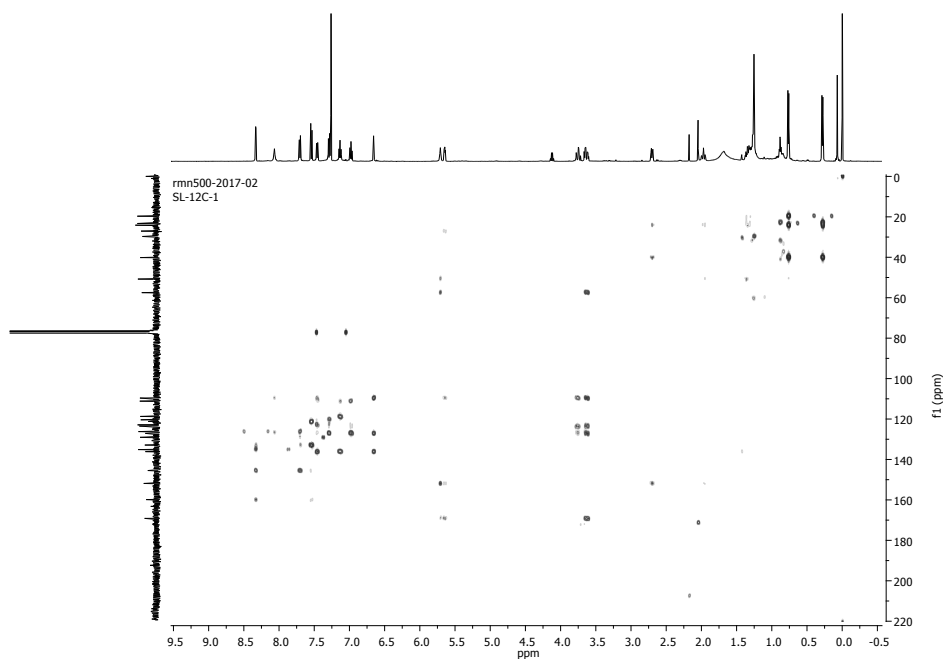

**Fig. S6.** HMBC NMR spectrum of (1*S*,4*R*)-4-((1*H*-indol-3-yl)methyl)-8-chloro-1-isobutyl-1,2-dihydro-6*H*-pyrazino[2,1-*b*]quinazoline-3,6(4*H*)-dione (**23**) ( $\text{CDCl}_3$ , 300, MHz).

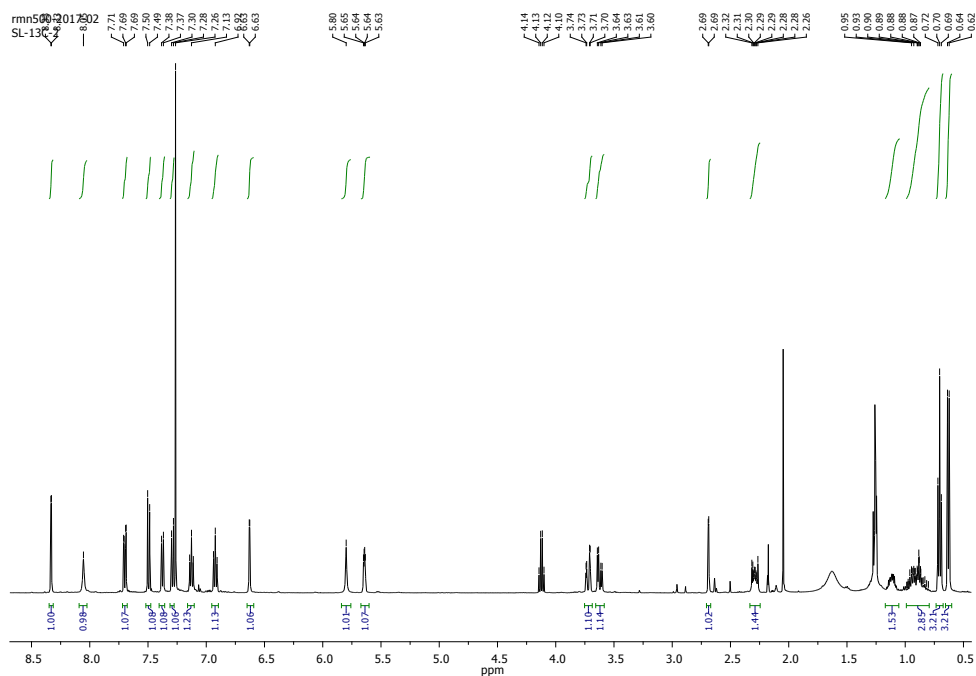

**Fig. S7.**  $^1\text{H}$  NMR spectrum of (1*S*,4*R*)-4-((1*H*-indol-3-yl)methyl)-1-((*S*)-sec-butyl)-8-chloro-1,2-dihydro-6*H*-pyrazino[2,1-*b*]quinazoline-3,6(4*H*)-dione (**24**) ( $\text{CDCl}_3$ , 300, MHz).

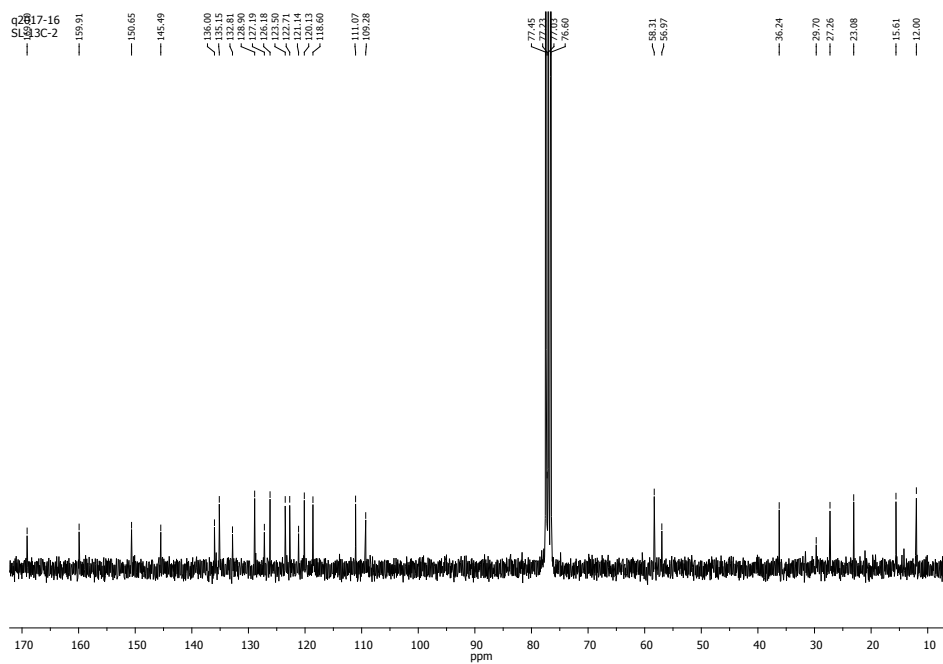

**Fig. S8.**  $^{13}\text{C}$  NMR spectrum of (1*S*,4*R*)-4-((1*H*-indol-3-yl)methyl)-1-((*S*)-sec-butyl)-8-chloro-1,2-dihydro-6*H*-pyrazino[2,1-*b*]quinazoline-3,6(4*H*)-dione (**24**) ( $\text{CDCl}_3$ , 75, MHz).

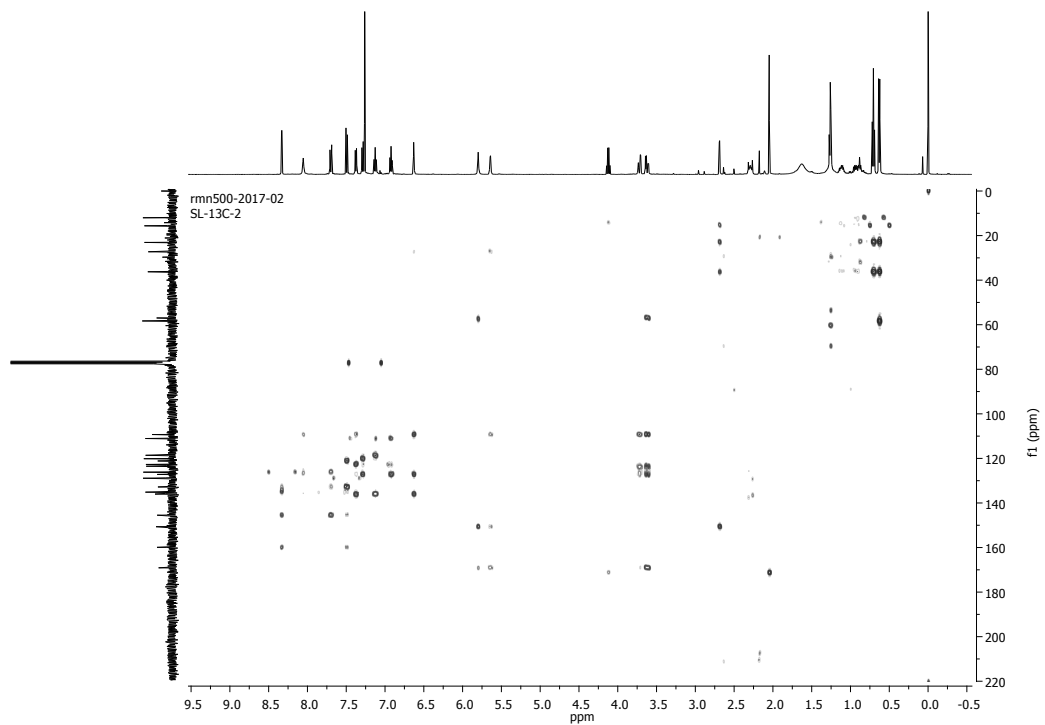

**Fig. S9.** HMBC NMR spectrum of (1*S*,4*R*)-4-((1*H*-indol-3-yl)methyl)-1-((*S*)-sec-butyl)-8-chloro-1,2-dihydro-6*H*-pyrazino[2,1-*b*]quinazoline-3,6(4*H*)-dione (**24**) (CDCl<sub>3</sub>, 300, MHz).

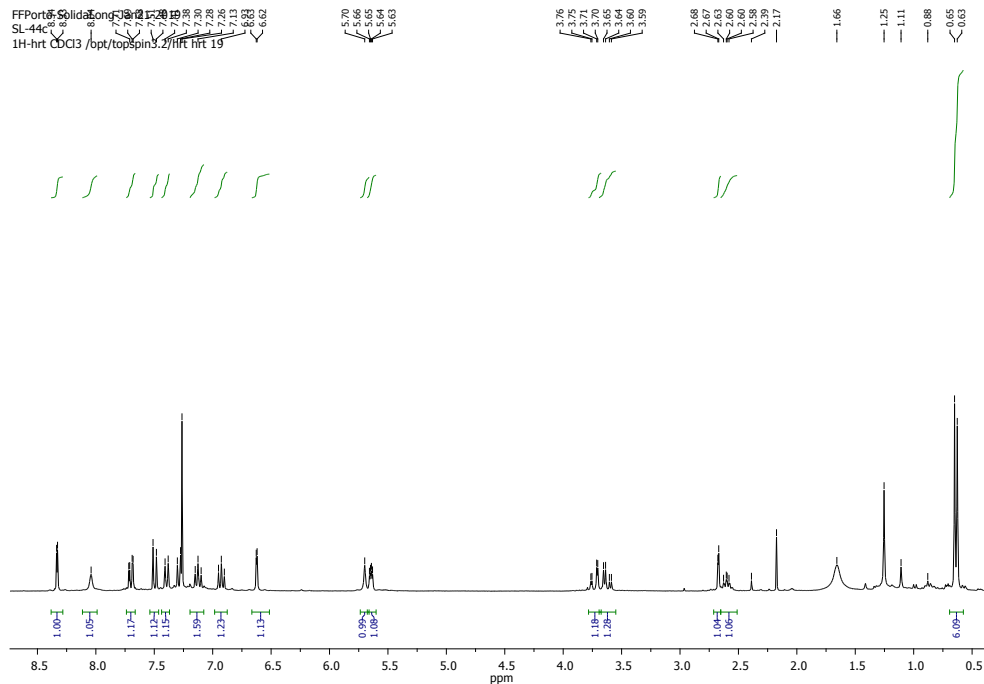

**Fig. S10.** <sup>1</sup>H NMR spectrum of (1*S*,4*R*)-4-((1*H*-indol-3-yl)methyl)-8,10-dichloro-1-isopropyl-1,2-dihydro-6*H*-pyrazino[2,1-*b*]quinazoline-3,6(4*H*)-dione (**25**) (CDCl<sub>3</sub>, 300, MHz).

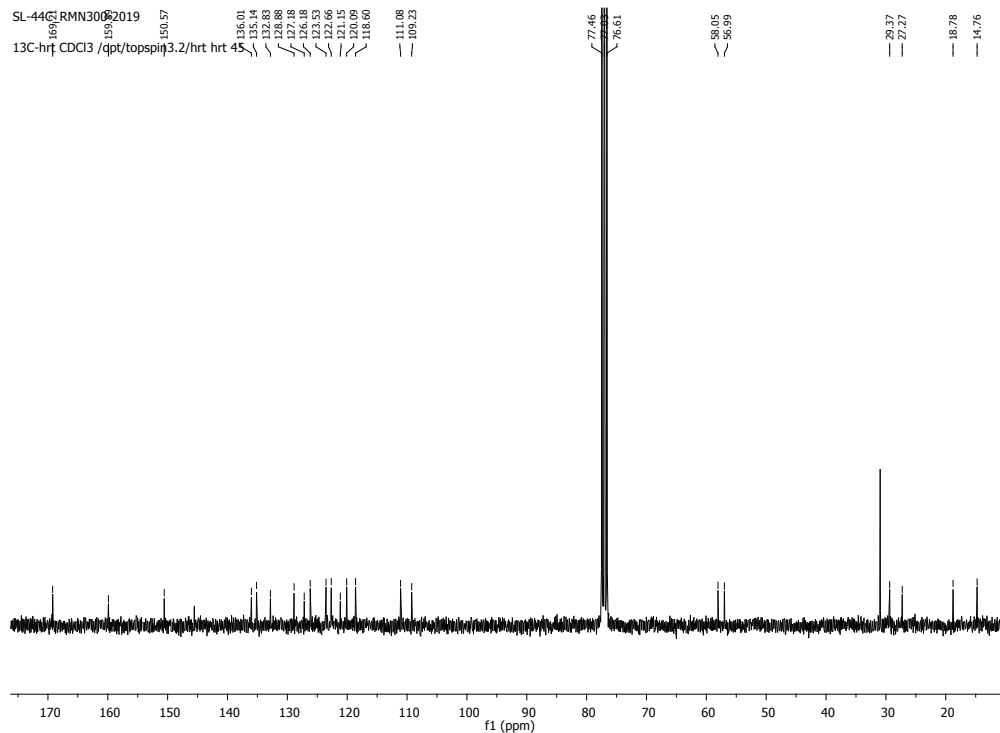

**Fig. S11.**  $^{13}\text{C}$  NMR spectrum of (1*S*,4*R*)-4-((1*H*-indol-3-yl)methyl)-8,10-dichloro-1-isopropyl-1,2-dihydro-6*H*-pyrazino[2,1-*b*]quinazoline-3,6(4*H*)-dione (**25**) ( $\text{CDCl}_3$ , 75, MHz).

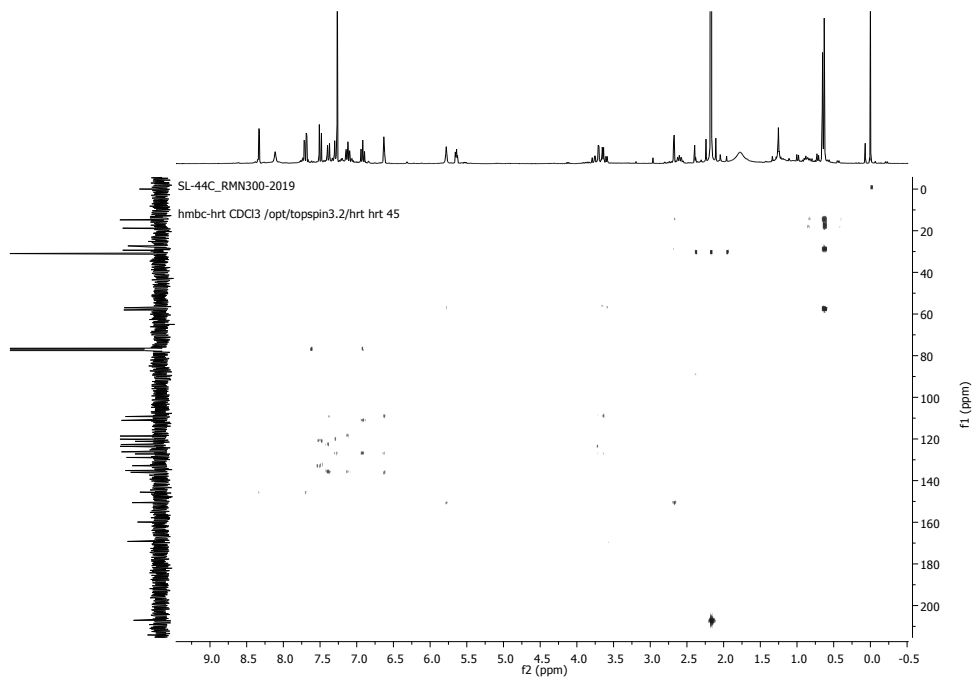

**Fig. S12.** HRMS NMR spectrum of (1*S*,4*R*)-4-((1*H*-indol-3-yl)methyl)-8,10-dichloro-1-isopropyl-1,2-dihydro-6*H*-pyrazino[2,1-*b*]quinazoline-3,6(4*H*)-dione (**25**) ( $\text{CDCl}_3$ , 300, MHz).

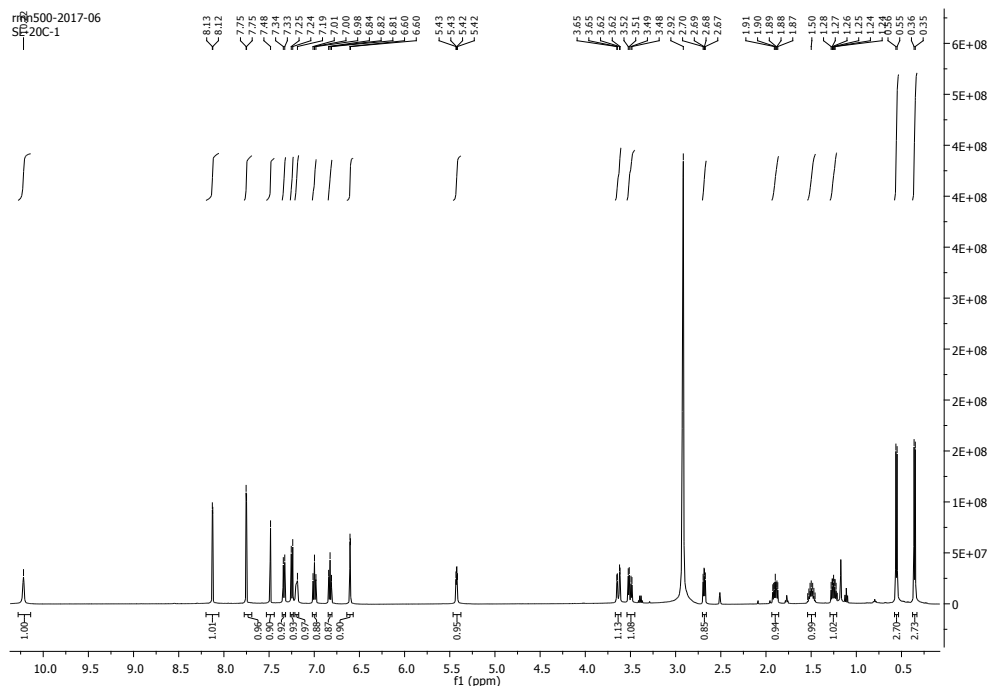

**Fig. S13.** <sup>1</sup>H NMR NMR spectrum of (1*S*,4*R*)-4-((1*H*-indol-3-yl)methyl)-8,10-dichloro-1-isobutyl-1,2-dihydro-6*H*-pyrazino[2,1-*b*]quinazoline-3,6(4*H*)-dione (**26**) (DMSO-*d*<sub>6</sub>, 300, MHz).

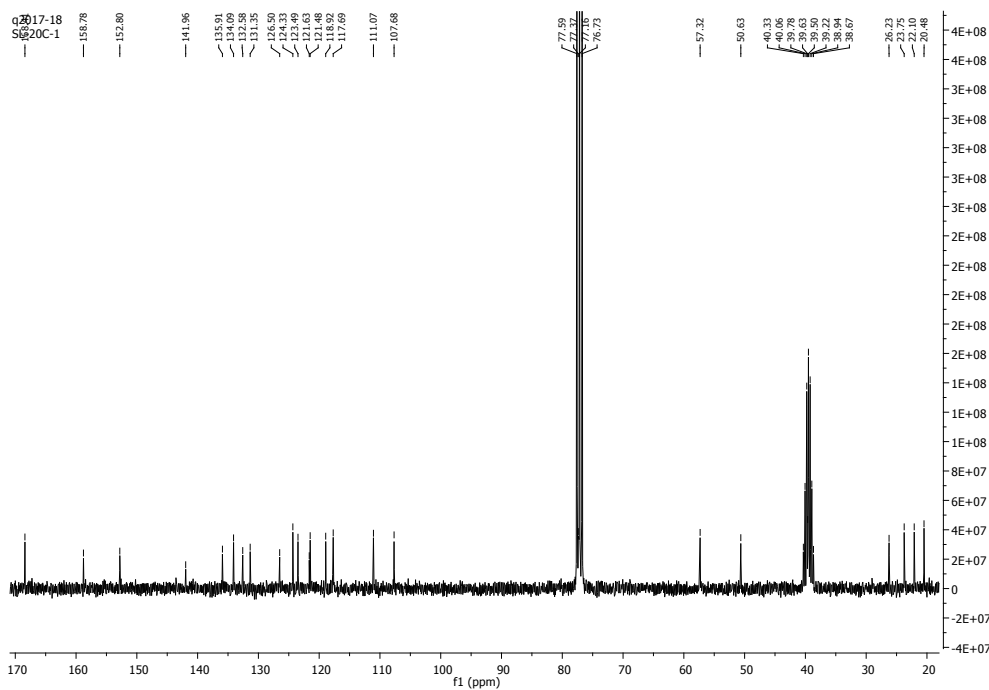

**Fig. S14.** <sup>13</sup>C NMR NMR spectrum of (1*S*,4*R*)-4-((1*H*-indol-3-yl)methyl)-8,10-dichloro-1-isobutyl-1,2-dihydro-6*H*-pyrazino[2,1-*b*]quinazoline-3,6(4*H*)-dione (**26**) (DMSO-*d*<sub>6</sub>, 75, MHz).



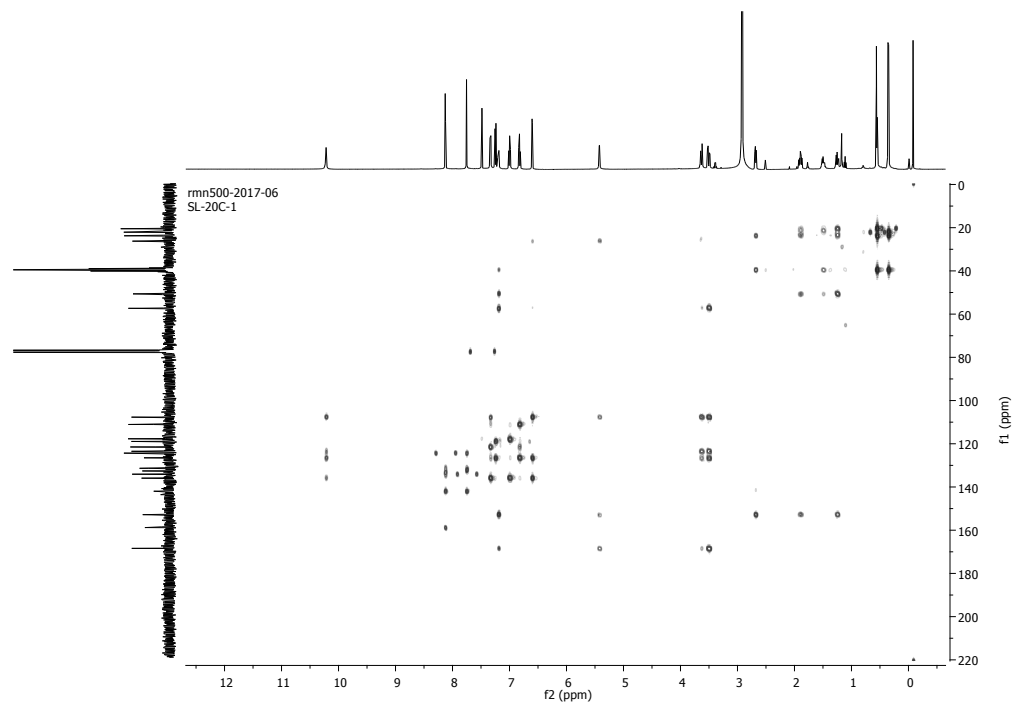

**Fig. S15.** HMBC NMR spectrum of (1*S*,4*R*)-4-((1*H*-indol-3-yl)methyl)-8,10-dichloro-1-isobutyl-1,2-dihydro-6*H*-pyrazino[2,1-*b*]quinazoline-3,6(4*H*)-dione (**26**) (DMSO-*d*<sub>6</sub>, 300, MHz)

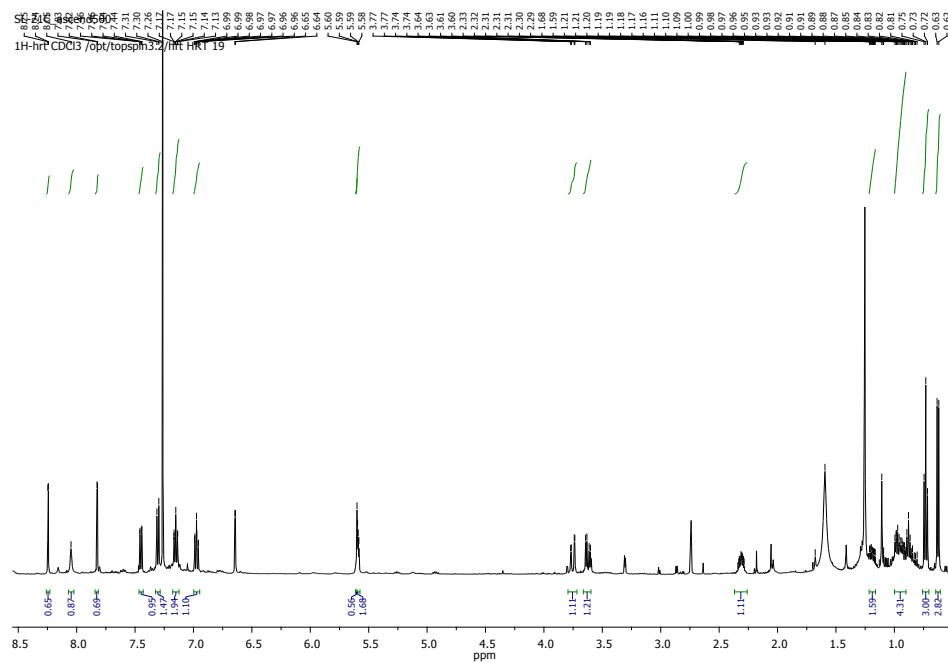

**Fig. S16.** <sup>1</sup>H NMR spectrum of (1*S*,4*R*)-4-((1*H*-indol-3-yl)methyl)-1-((*S*)-sec-butyl)-8,10-dichloro-1,2-dihydro-6*H*-pyrazino[2,1-*b*]quinazoline-3,6(4*H*)-dione (**27**) (CDCl<sub>3</sub>, 300, MHz).

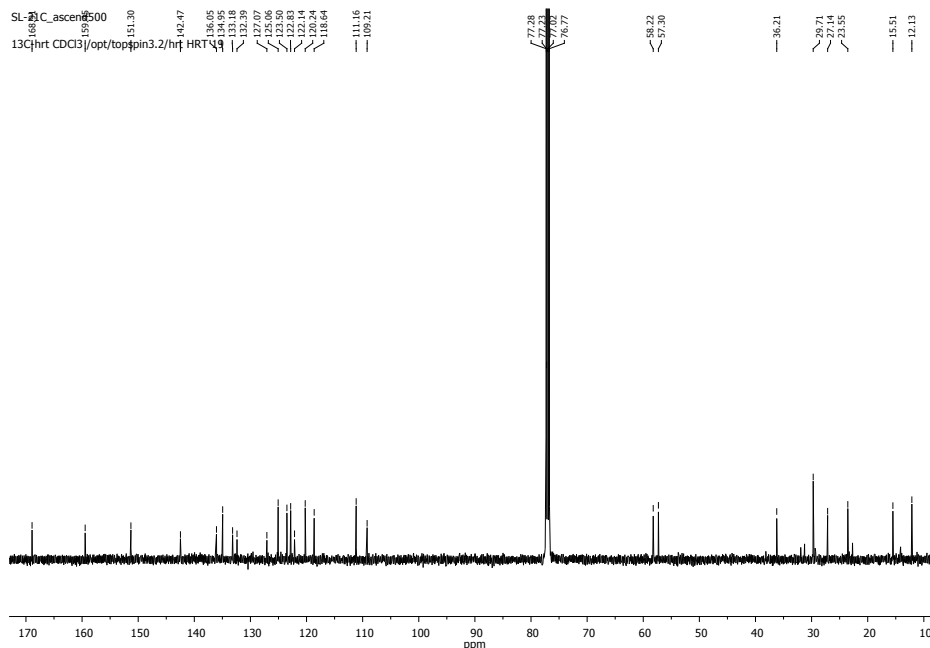

**Fig. S17.**  $^{13}\text{C}$  NMR spectrum of (1*S*,4*R*)-4-((1*H*-indol-3-yl)methyl)-1-((*S*)-sec-butyl)-8,10-dichloro-1,2-dihydro-6*H*-pyrazino[2,1-*b*]quinazoline-3,6(4*H*)-dione (**27**) ( $\text{CDCl}_3$ , 75, MHz).

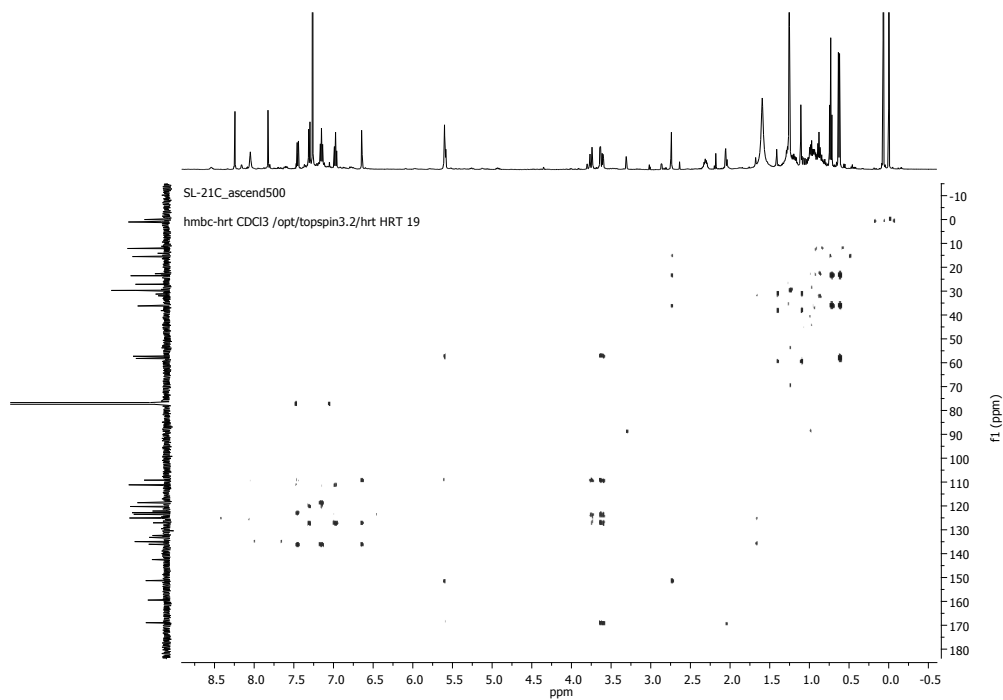

**Fig. S18.** HMBC spectrum of (1*S*,4*R*)-4-((1*H*-indol-3-yl)methyl)-1-((*S*)-sec-butyl)-8,10-dichloro-1,2-dihydro-6*H*-pyrazino[2,1-*b*]quinazoline-3,6(4*H*)-dione (**27**) ( $\text{CDCl}_3$ , 300, MHz).



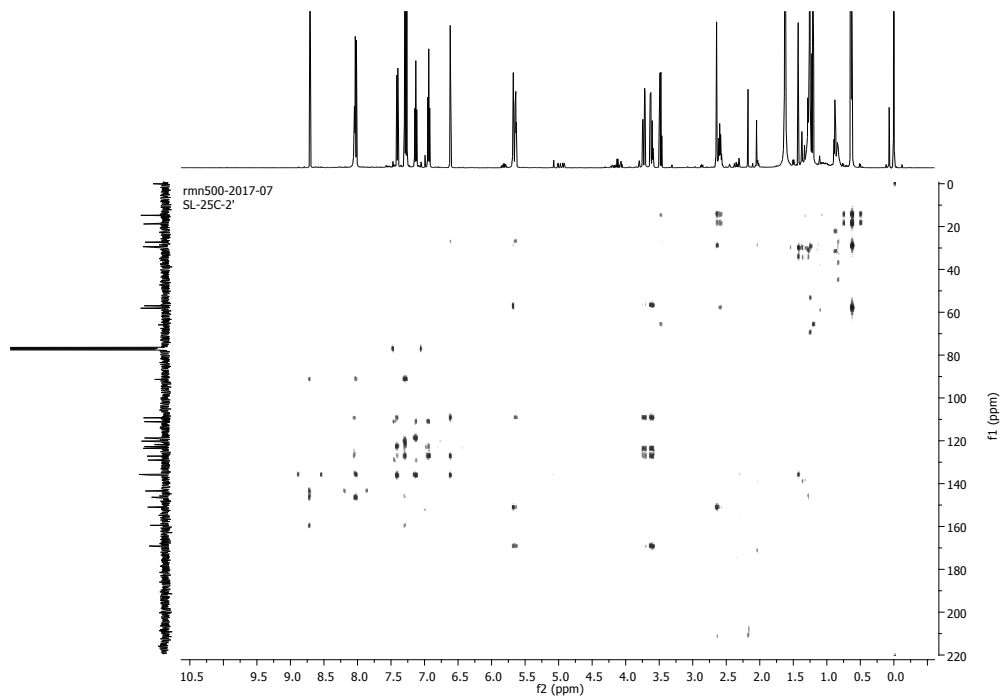

**Fig. S21.** HMBC spectrum of (1*S*,4*R*)-4-((1*H*-indol-3-yl)methyl)-8-iodo-1-isopropyl-1,2-dihydro-6*H*-pyrazino[2,1-*b*]quinazoline-3,6(4*H*)-dione (**28**) (CDCl<sub>3</sub>, 300, MHz).

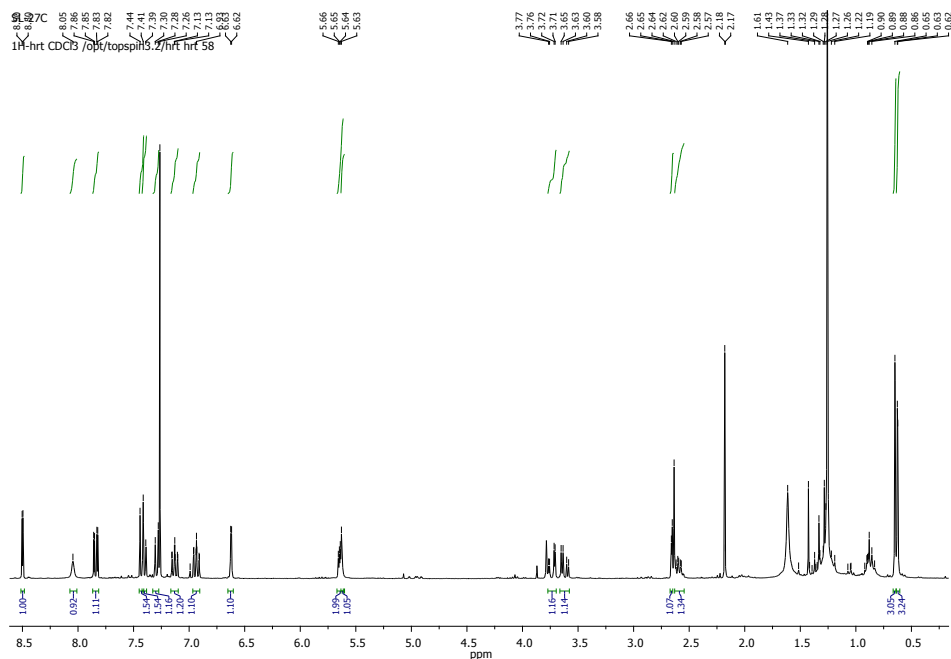

**Fig. S22.** <sup>1</sup>H NMR spectrum of (1*S*,4*R*)-4-((1*H*-indol-3-yl)methyl)-8-bromo-1-isopropyl-1,2-dihydro-6*H*-pyrazino[2,1-*b*]quinazoline-3,6(4*H*)-dione (**29**) (CDCl<sub>3</sub>, 300, MHz).

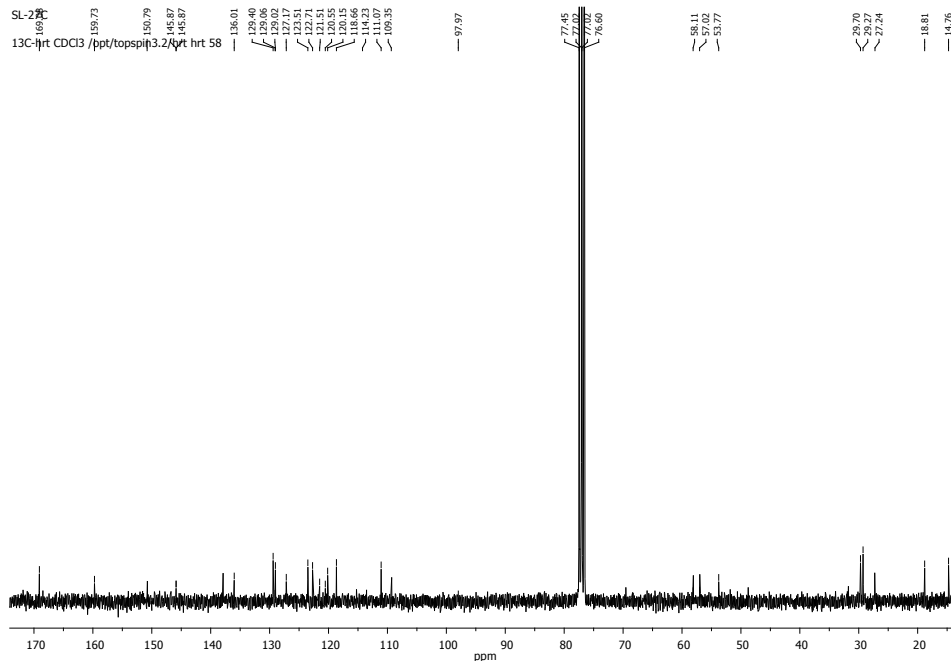

**Fig. S23.**  $^{13}\text{C}$  NMR spectrum of (1*S*,4*R*)-4-((1*H*-indol-3-yl)methyl)-8-bromo-1-isopropyl-1,2-dihydro-6*H*-pyrazino[2,1-*b*]quinazoline-3,6(4*H*)-dione (**29**) ( $\text{CDCl}_3$ , 75, MHz).

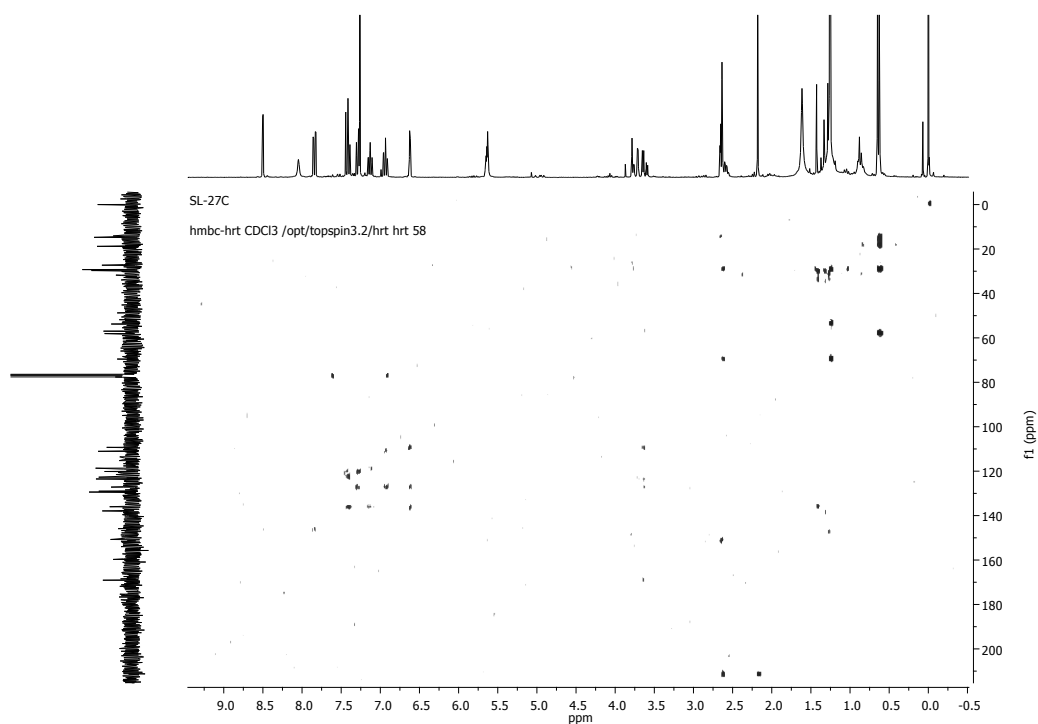

**Fig. S24.** HMBC spectrum of (1*S*,4*R*)-4-((1*H*-indol-3-yl)methyl)-8-bromo-1-isopropyl-1,2-dihydro-6*H*-pyrazino[2,1-*b*]quinazoline-3,6(4*H*)-dione (**29**) ( $\text{CDCl}_3$ , 300, MHz).

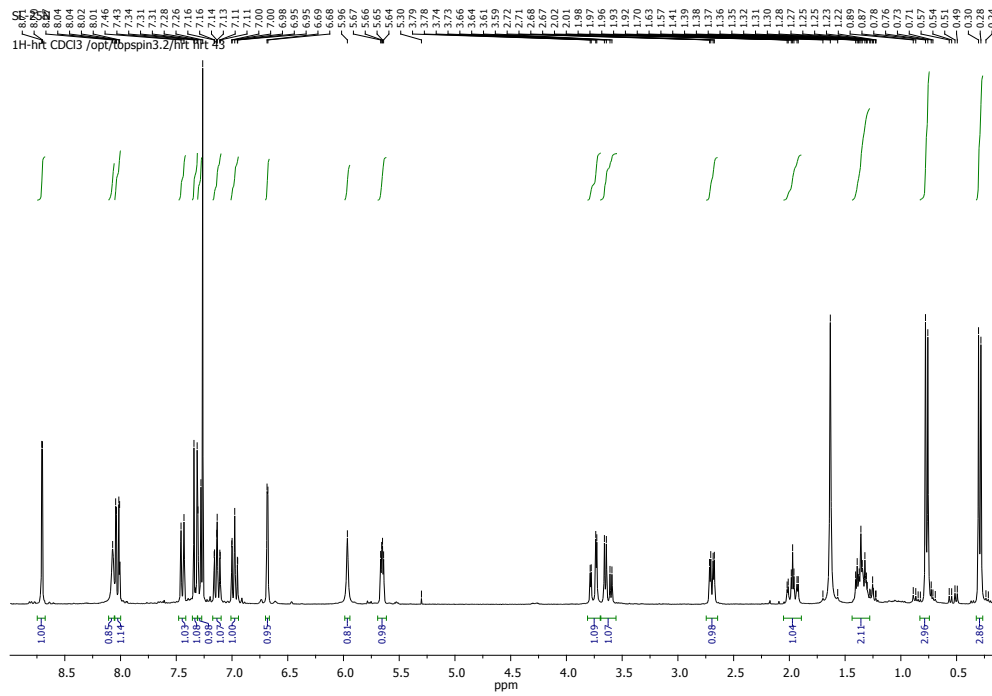

**Fig. S25.** <sup>1</sup>H NMR spectrum of (1*S*,4*R*)-4-((1*H*-indol-3-yl)methyl)-8-iodo-1-isobutyl-1,2-dihydro-6*H*-pyrazino[2,1-*b*]quinazoline-3,6(4*H*)-dione (**30**) (CDCl<sub>3</sub>, 300, MHz).

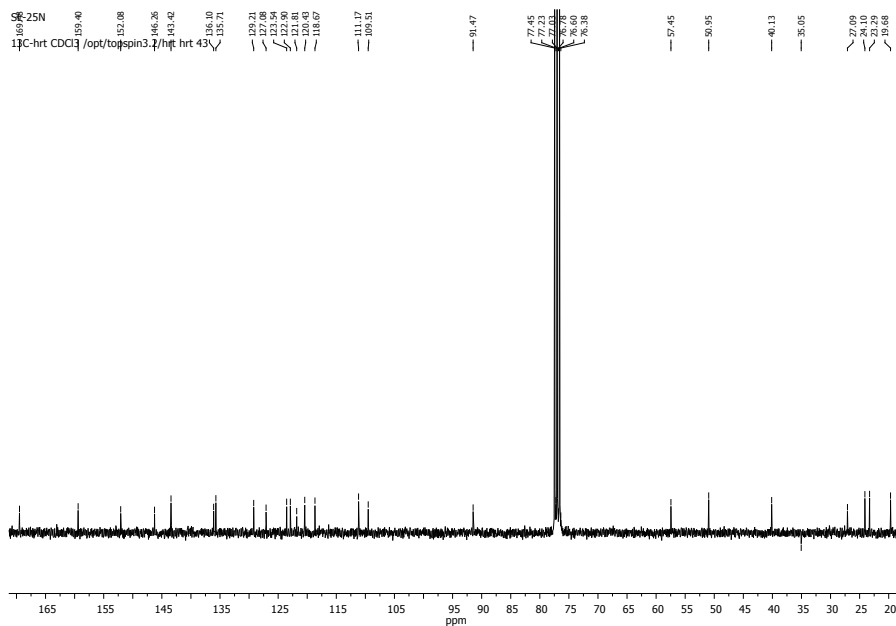

**Fig. S26.** <sup>13</sup>C NMR spectrum of (1*S*,4*R*)-4-((1*H*-indol-3-yl)methyl)-8-iodo-1-isobutyl-1,2-dihydro-6*H*-pyrazino[2,1-*b*]quinazoline-3,6(4*H*)-dione (**30**) (CDCl<sub>3</sub>, 75, MHz).



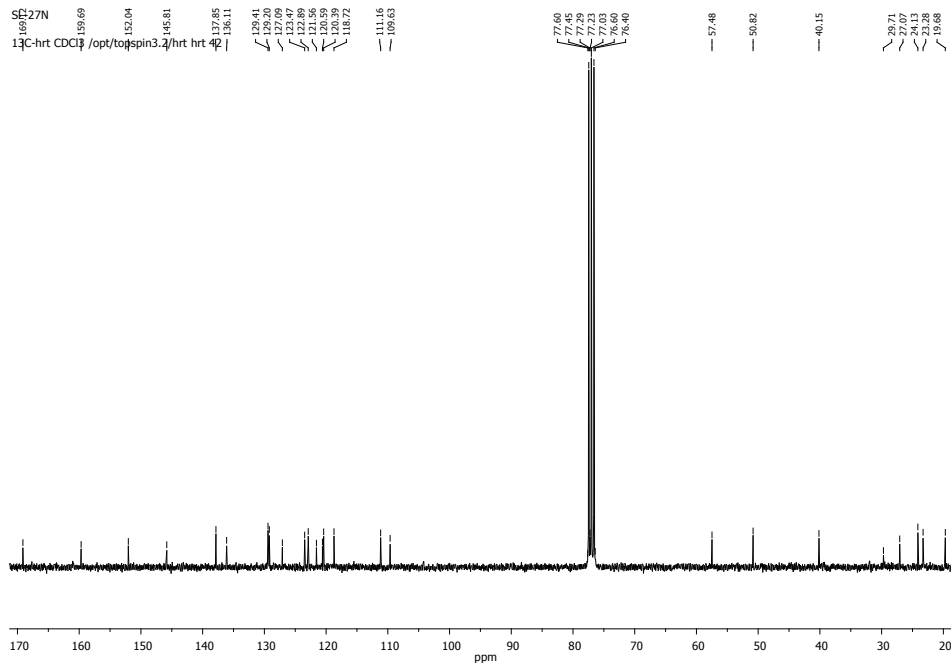

**Fig. S29.** <sup>13</sup>C NMR spectrum of (1*S*,4*R*)-4-((1*H*-indol-3-yl)methyl)-8-bromo-1-isobutyl-1,2-dihydro-6*H*-pyrazino[2,1-*b*]quinazoline-3,6(4*H*)-dione (**31**) (CDCl<sub>3</sub>, 75, MHz).

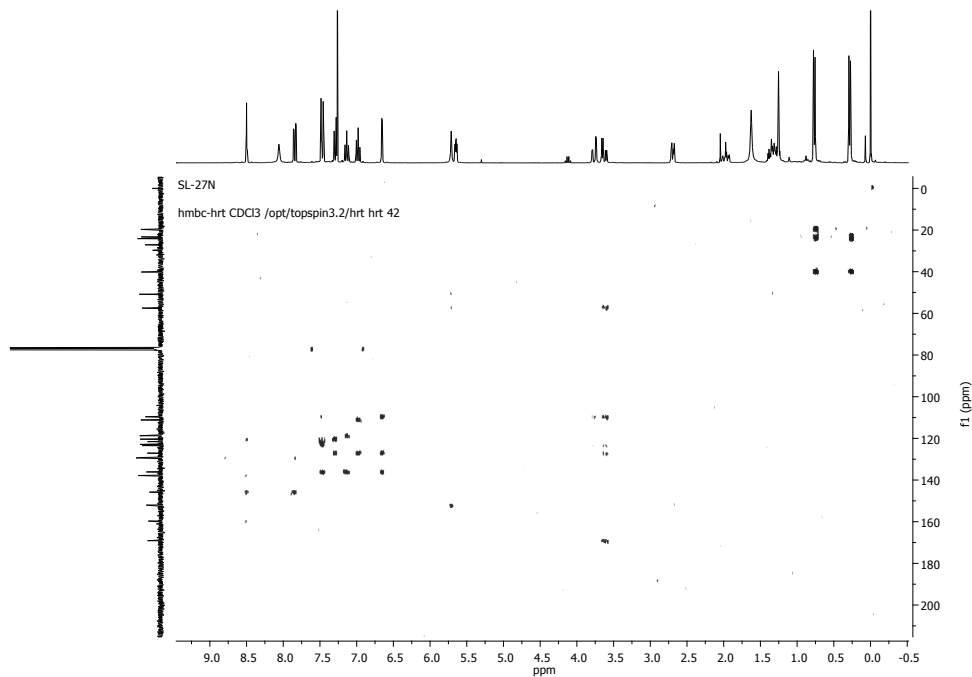

**Fig. S30.** <sup>1</sup>H NMR spectrum of (1*S*,4*R*)-4-((1*H*-indol-3-yl)methyl)-8-bromo-1-isobutyl-1,2-dihydro-6*H*-pyrazino[2,1-*b*]quinazoline-3,6(4*H*)-dione (**31**) (DMSO-*d*<sub>6</sub>, 300, MHz).



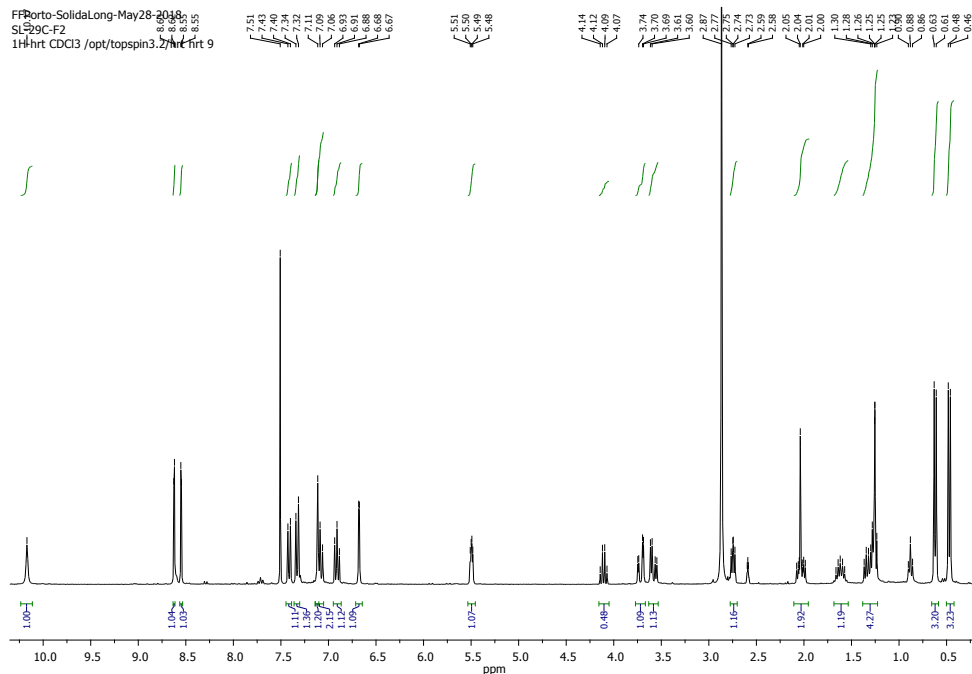

**Fig. S31.**  $^1\text{H}$  NMR spectrum of (1*S*,4*R*)-4-((1*H*-indol-3-yl)methyl)-8,10-diiodo-1-isobutyl-1,2-dihydro-6*H*-pyrazino[2,1-*b*]quinazoline-3,6(4*H*)-dione (**32**) (DMSO- $d_6$ , 300, MHz).

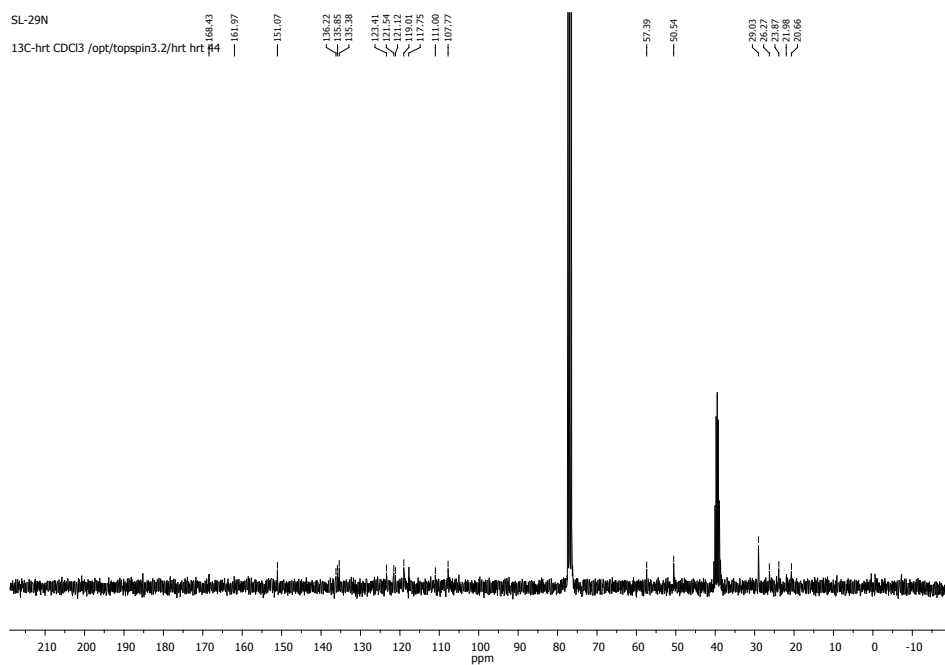

**Fig. S32.**  $^{13}\text{C}$  NMR spectrum of (1*S*,4*R*)-4-((1*H*-indol-3-yl)methyl)-8,10-diiodo-1-isobutyl-1,2-dihydro-6*H*-pyrazino[2,1-*b*]quinazoline-3,6(4*H*)-dione (**32**) (DMSO- $d_6$ , 75, MHz).

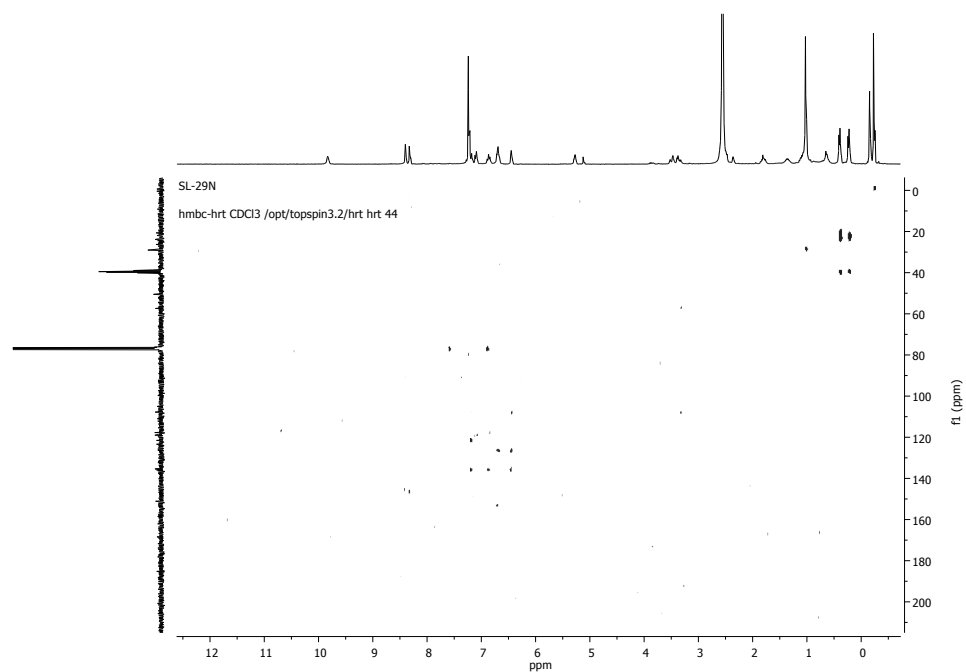

**Fig. S33.** HMBC spectrum of (1*S*,4*R*)-4-((1*H*-indol-3-yl)methyl)-8,10-diiodo-1-isobutyl-1,2-dihydro-6*H*-pyrazino[2,1-*b*]quinazoline-3,6(4*H*)-dione (**32**) (DMSO-*d*<sub>6</sub>, 300, MHz).

## 2. Enantioselective liquid chromatography

### 2.1 Chiral analysis of compounds 22-32

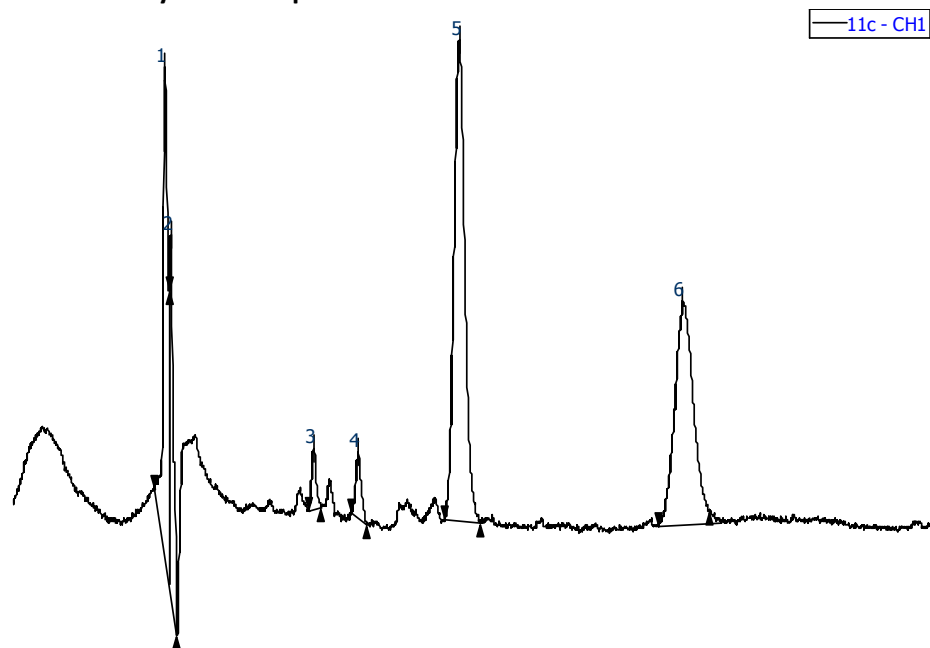

**Fig. S34.** Chiral analysis of (1*S*,4*R*)-4-((1*H*-indol-3-yl)methyl)-8-chloro-1-isopropyl-1,2-dihydro-6*H*-pyrazino[2,1-*b*]quinazoline-3,6(4*H*)-dione (**22**), Mobile phase: Hexane:MeOH, 90:10; flow rate: 0.5 mL/min.

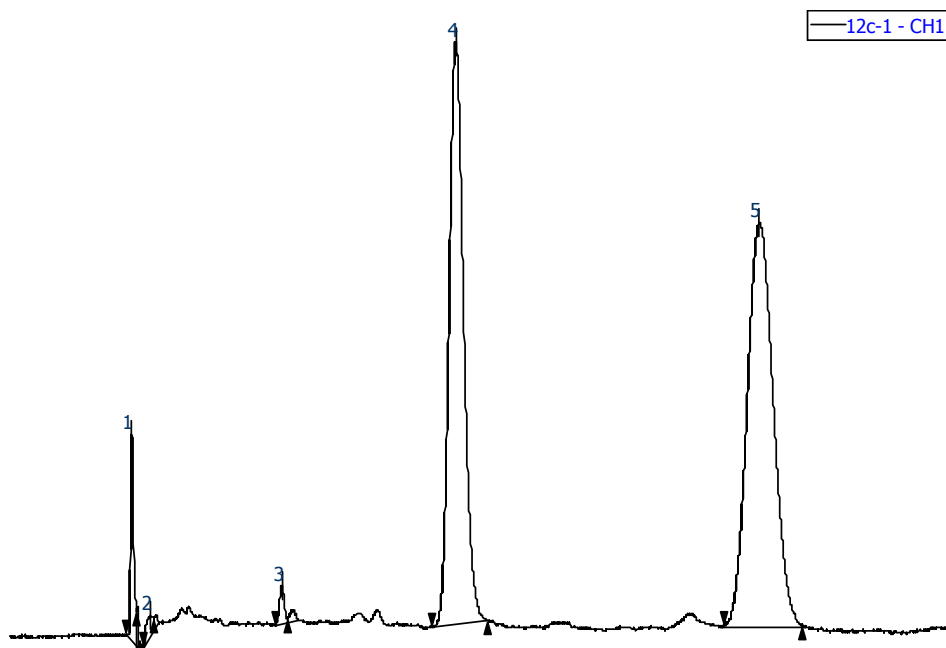

**Fig. S35.** Chiral analysis of (1*S*,4*R*)-4-((1*H*-indol-3-yl)methyl)-8-chloro-1-isobutyl-1,2-dihydro-6*H*-pyrazino[2,1-*b*]quinazoline-3,6(4*H*)-dione (**23**), Mobile phase: Hexane:MeOH, 90:10; flow rate: 0.5 mL/min.

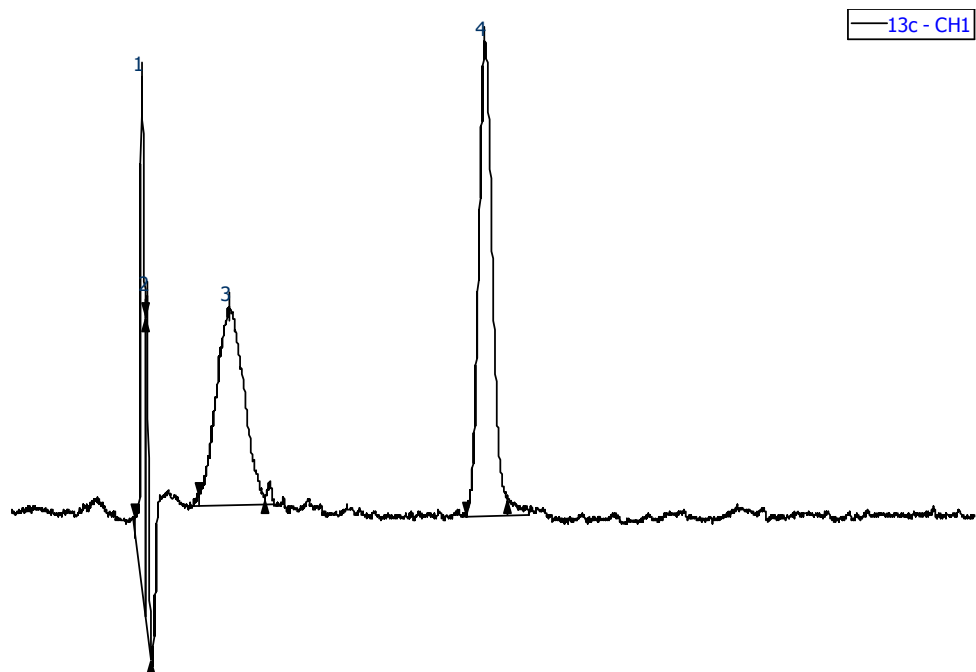

**Fig. S36.** Chiral analysis of (1*S*,4*R*)-4-((1*H*-indol-3-yl)methyl)-1-((*S*)-sec-butyl)-8-chloro-1,2-dihydro-6*H*-pyrazino[2,1-*b*]quinazoline-3,6(4*H*)-dione (**24**), Mobile phase: Hexane:MeOH, 90:10; flow rate: 0.5 mL/min.

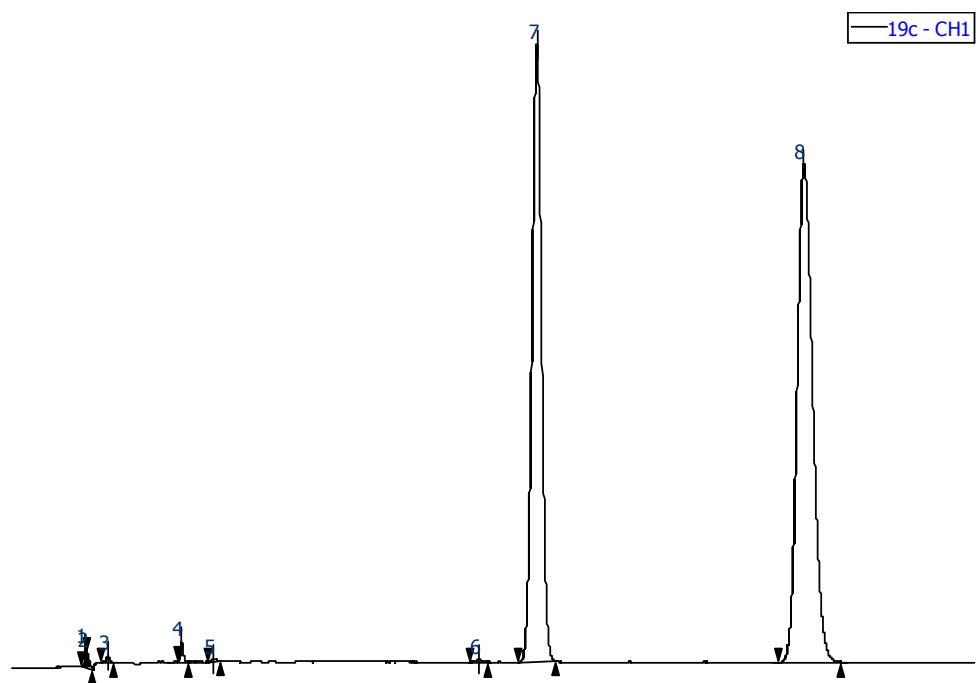

**Fig. S37.** Chiral analysis of (1*S*,4*R*)-4-((1*H*-indol-3-yl)methyl)-8,10-dichloro-1-isopropyl-1,2-dihydro-6*H*-pyrazino[2,1-*b*]quinazoline-3,6(4*H*)-dione (**25**), Solvent: Hexan:MeOH, 90:10; flow rate: 0.5 mL/min.

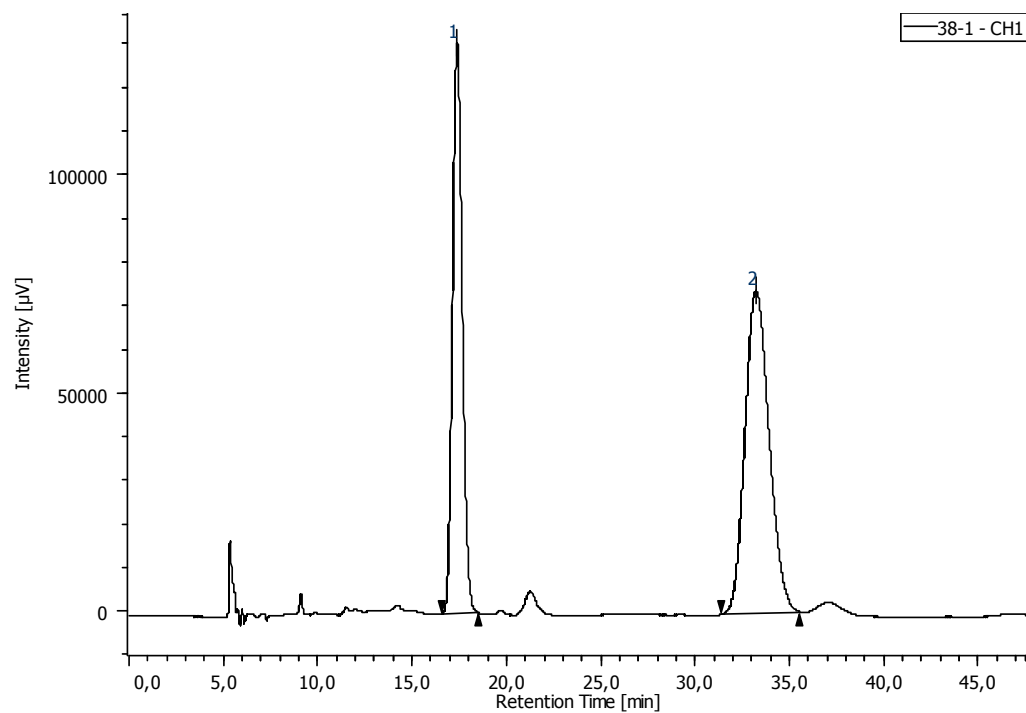

**Fig. S38.** Chiral analysis of (1*S*,4*R*)-4-((1*H*-indol-3-yl)methyl)-8,10-dichloro-1-isobutyl-1,2-dihydro-6*H*-pyrazino[2,1-*b*]quinazoline-3,6(4*H*)-dione (**26**), Mobile phase: Hexane:MeOH, 90:10; flow rate: 0.5 mL/min.

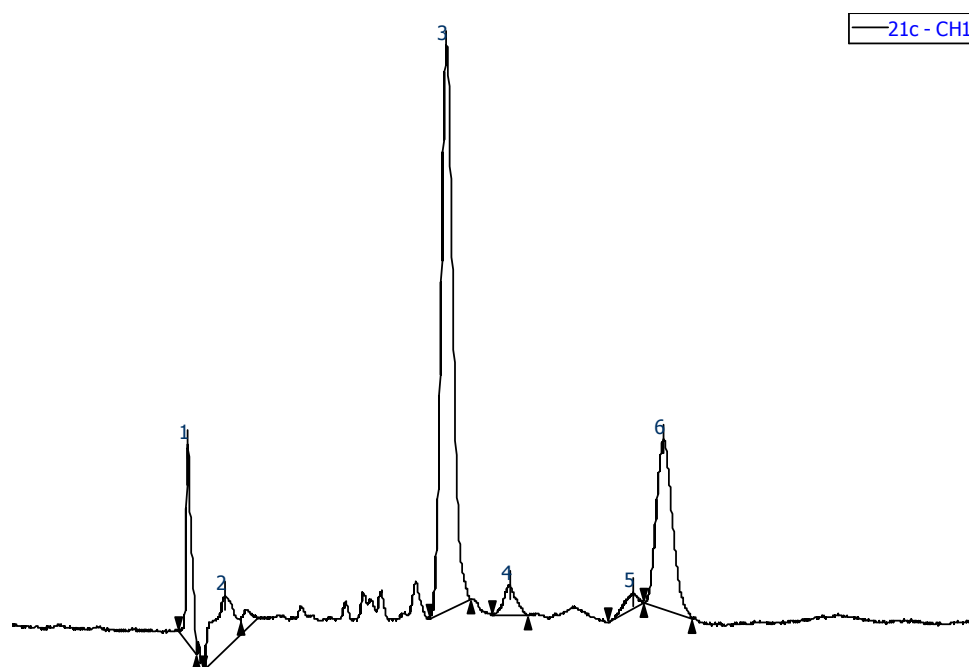

**Fig. S39.** Chiral analysis of (1*S*,4*R*)-4-((1*H*-indol-3-yl)methyl)-8,10-dichloro-1-((*S*)-sec-butyl)-1,2-dihydro-6*H*-pyrazino[2,1-*b*]quinazoline-3,6(4*H*)-dione (**27**), Mobile phase: Hexane:MeOH, 90:10; flowrate: 0.5 mL/min.

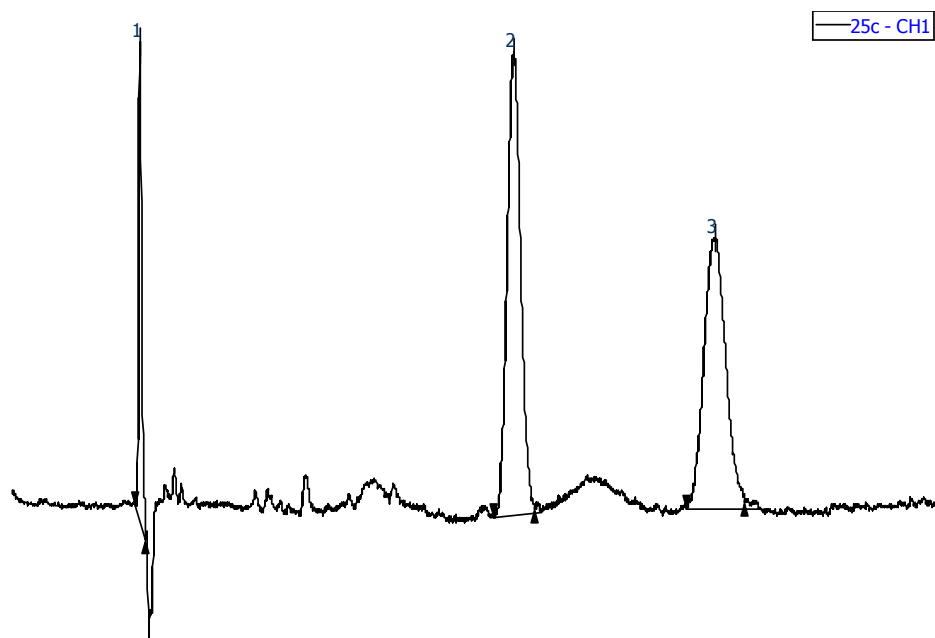

**Fig. S40.** Chiral analysis of (1*S*,4*R*)-4-((1*H*-indol-3-yl)methyl)-8-iodo-1-isopropyl-1,2-dihydro-6*H*-pyrazino[2,1-*b*]quinazoline-3,6(4*H*)-dione (**28**), Mobile phase: Hexane:MeOH, 90:10; flow rate: 0.5 mL/min.

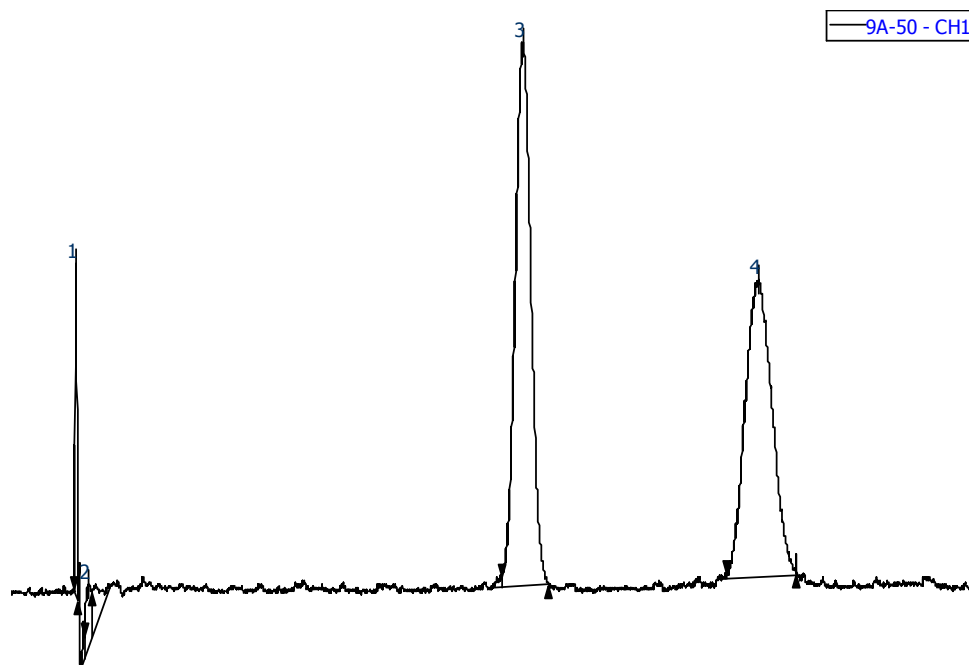

**Fig. S41.** Chiral analysis of (1*S*,4*R*)-4-((1*H*-indol-3-yl)methyl)-8-bromo-1-isopropyl-1,2-dihydro-6*H*-pyrazino[2,1-*b*]quinazoline-3,6(4*H*)-dione (**29**), Mobile phase: Hexane:MeOH, 90:10; flow rate: 0.5 mL/min.

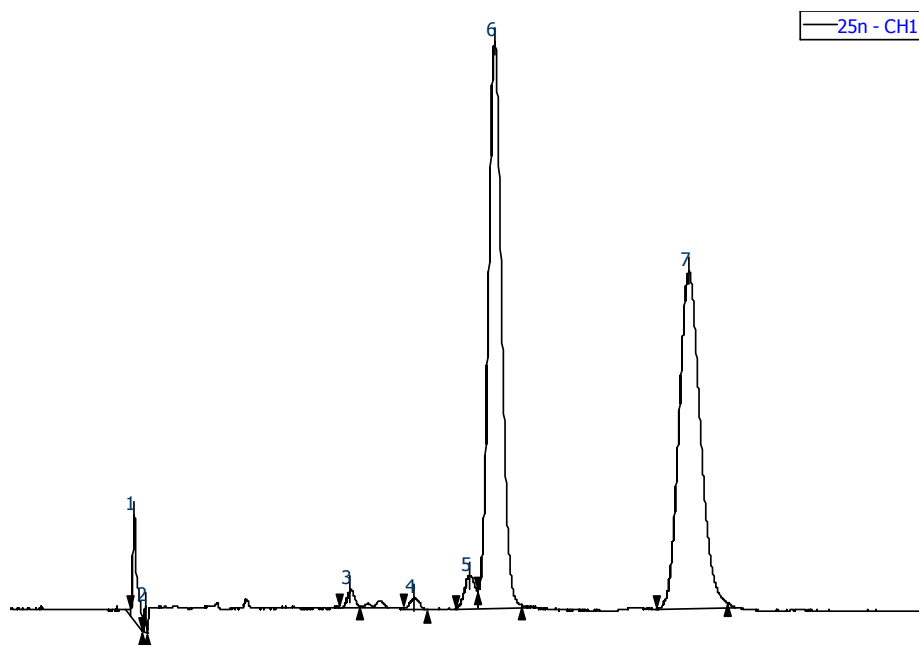

**Fig. S42.** Chiral analysis of (1*S*,4*R*)-4-((1*H*-indol-3-yl)methyl)-8-iodo-1-isobutyl-1,2-dihydro-6*H*-pyrazino[2,1-*b*]quinazoline-3,6(4*H*)-dione (**30**), Mobile phase: Hexane:MeOH, 90:10; flow rate: 0.5 mL/min.

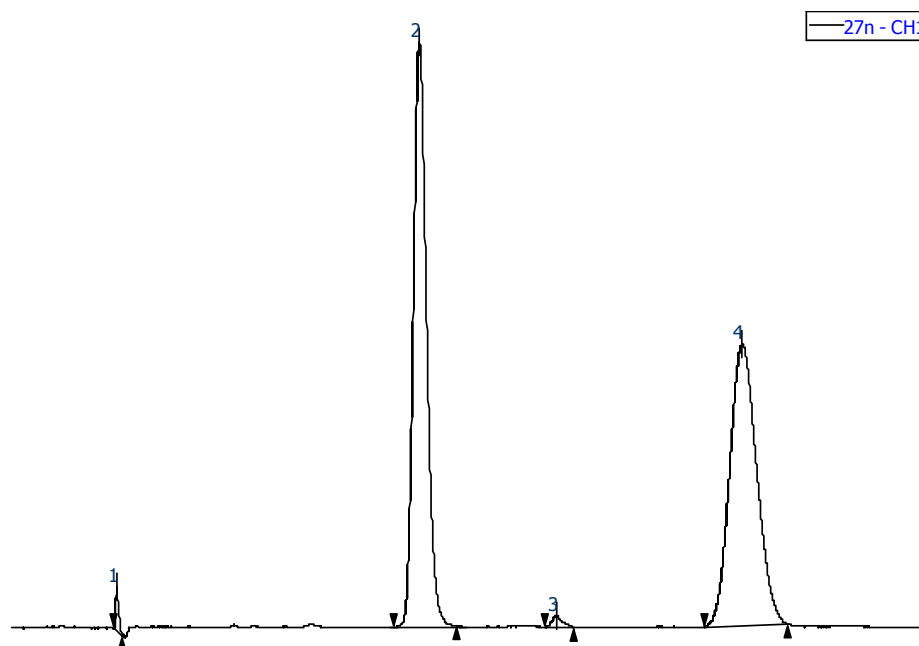

**Fig. S43.** Chiral analysis of (1*S*,4*R*)-4-((1*H*-indol-3-yl)methyl)-8-bromo-1-isobutyl-1,2-dihydro-6*H*-pyrazino[2,1-*b*]quinazoline-3,6(4*H*)-dione (**31**), Mobile phase: Hexane:MeOH, 90:10; flow rate: 0.5 mL/min.

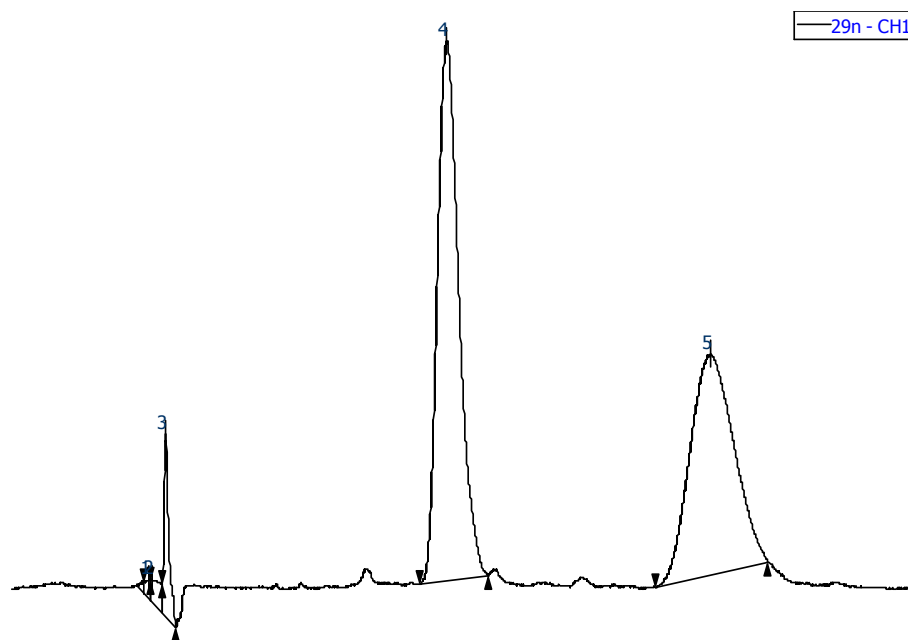

**Fig. S44.** Chiral analysis of (1*S*,4*R*)-4-((1*H*-indol-3-yl)methyl)-8,10-diiodo-1-isobutyl-1,2-dihydro-6*H*-pyrazino[2,1-*b*]quinazoline-3,6(4*H*)-dione (**32**), Mobile phase: Hexan:MeOH, 90:10; flowrate: 0.5 mL/min.

## 2.2 Peak purity analyzed on Reversed-Phase HPLC of compounds 22, 23, and 26

The peak purities of most promising compounds were analyzed using reversed-phase liquid chromatography separation employed FortisBIO C18 Column (250 x 4.6 mm, Part number: BIO315-050905), the mobile phase was MeCN/MeOH 50:50, running time: 30 min, minimum wavelength: 210 nm, maximum wavelength: 800 nm. The purity view properties: wavelength range: 225-800 nm, scan threshold: 5 mAU, peak coverage: 95%.



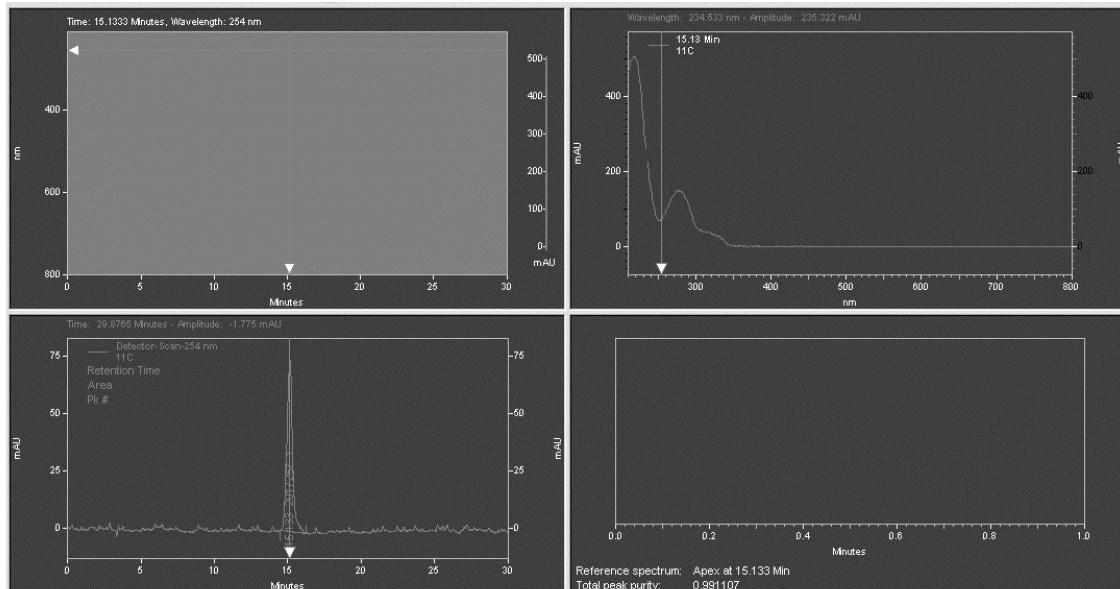

**Fig. S45.** Peak purity of (1*S*,4*R*)-4-((1*H*-indol-3-yl)methyl)-8-chloro-1-isopropyl-1,2-dihydro-6*H*-pyrazino[2,1-*b*]quinazoline-3,6(4*H*)-dione (**22**).

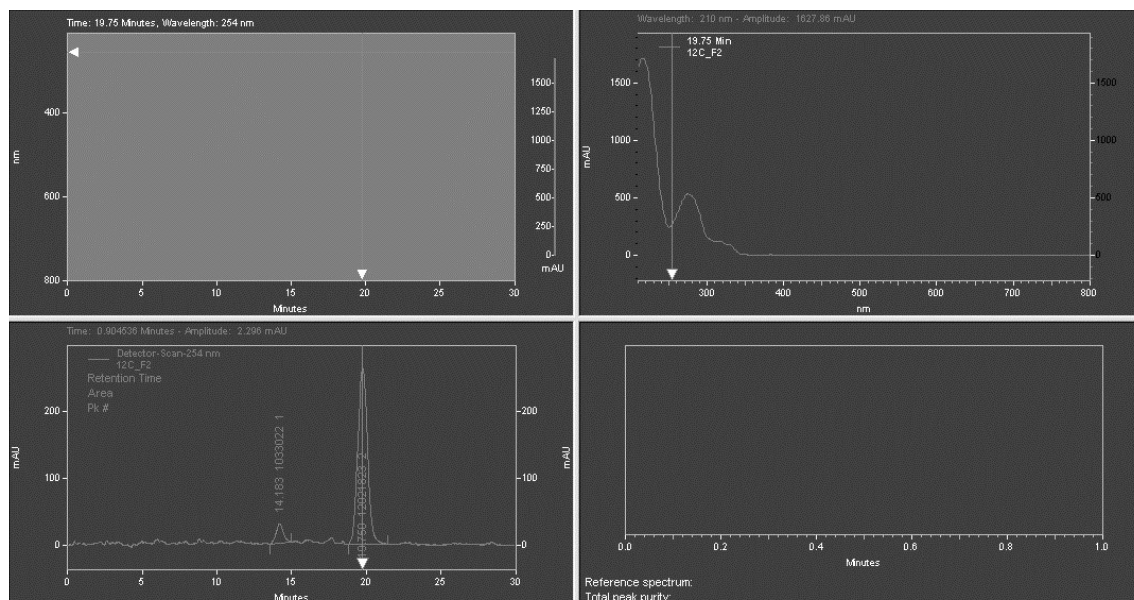

**Fig. S46.** Peak purity of (1*S*,4*R*)-4-((1*H*-indol-3-yl)methyl)-8-chloro-1-isobutyl-1,2-dihydro-6*H*-pyrazino[2,1-*b*]quinazoline-3,6(4*H*)-dione (**23**).

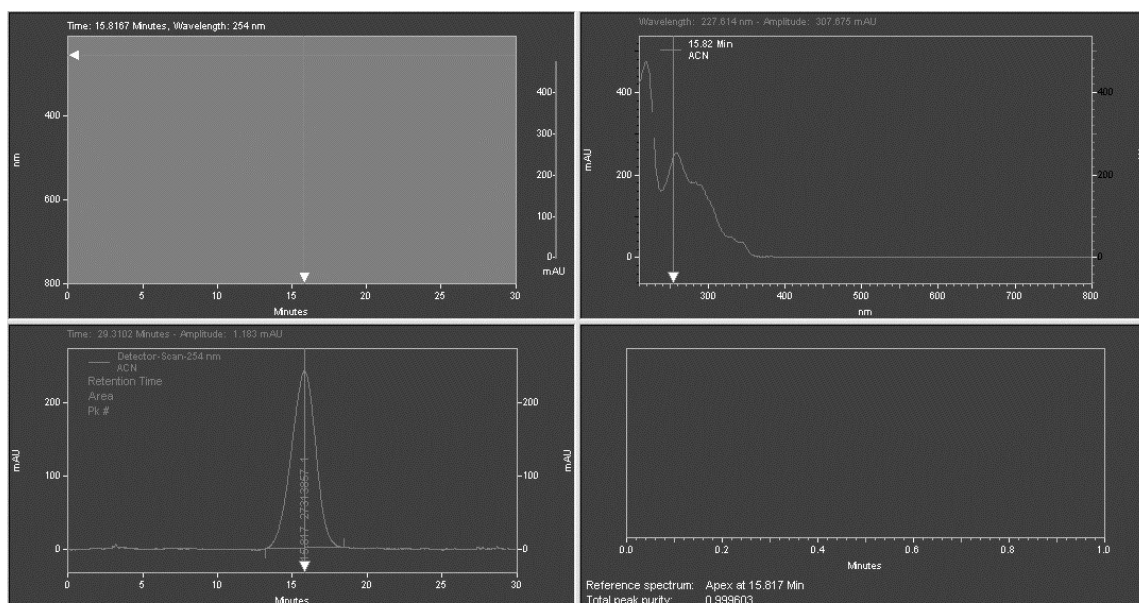

**Fig. S47.** Peak purity of (1*S*,4*R*)-4-((1*H*-indol-3-yl)methyl)-8,10-dichloro-1-isobutyl-1,2-dihydro-6*H*-pyrazino[2,1-*b*]quinazoline-3,6(4*H*)-dione (**26**).

### 2.3 Enantioselective liquid chromatography separation of compounds **22**, **23**, and **26**

Enantioselective liquid chromatography. In order to evaluate enantioselectivity in vitro activities, such as antibacterial and antifungal, the most promising derivatives **22**, **23**, and **26**, were obtained in milligram scale by semipreparative enantioselective liquid chromatography, employing a tris-3,5-dimethylphenylcarbamate amylose column with multiple injection in a 200  $\mu$ L loop. Initial conditions were investigated with analytical Pirkle columns in polar mode [Whelk-O1-S,S (250  $\times$  4.6 mm) and UV-detection at 245 nm, mobile phase MeOH/MeCN 50:50, flow rate 1.0 mL/min] and polysaccharide based columns (amylose and cellulose) in multimodal conditions. The best analytical conditions [Amylose-1, (250  $\times$  4.6 mm), mobile phase hexane:EtOH, 90:10, flow rate 0.5 mL/min] presented good separation ( $\alpha > 1.2$ ) and resolution values ( $R_s > 8$ ) for all compounds to allow the scale-up to the preparative mode. The semipreparative separation was optimized by adjusting the sample volume from the analytical method. The optimized mobile phase of analytical system (hexane:EtOH, 90:10) was transferred without any modification to semipreparative mode and 254 was chosen as minimum wavelength absorption. The column diameter was enlarged to a scale-up factor of 3. The flow rate was increase from 0.5 to 2 mL/min, and the retention times were between 15 to 50 min. The loading effect in semipreparative mode was examined by keeping the concentration of the feed solution at the maximum (1.5 mg/mL) and by varying the volume (100 to 200  $\mu$ L). The mobile phase composition, chromatograms, and chromatographic parameters (Tables S1 and S2) at analytical and semipreparative scales.

**Table S1.** Separation performance on the amylose tris-3,5-dimethylphenylcarbamate phase for compounds **22**, **23**, and **26**.

Compounds structure    Analytical column [a]    Semipreparative column [b]

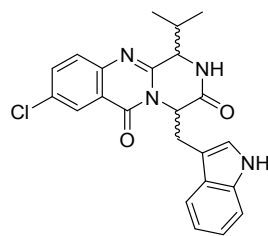

22

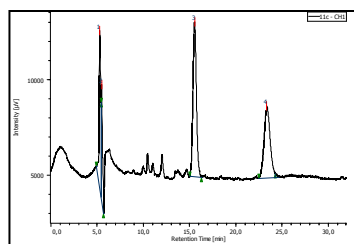

( $k_1 = 1.95$ ,  $\alpha = 1.76$   $R_s = 8.43$ )

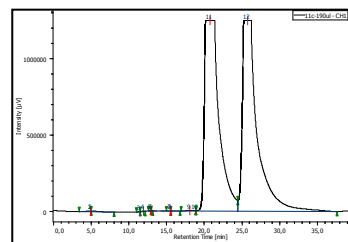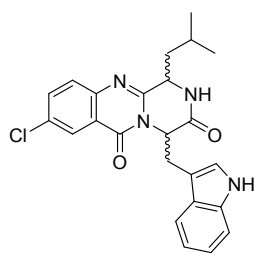

23

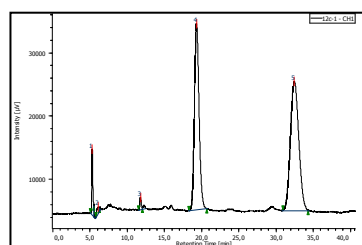

( $k_1 = 2.64$ ,  $\alpha = 1.94$   $R_s = 8.15$ )

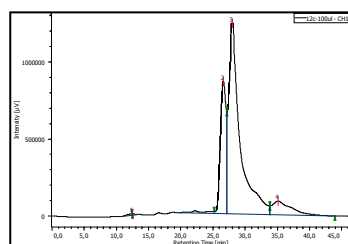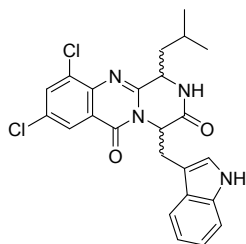

26

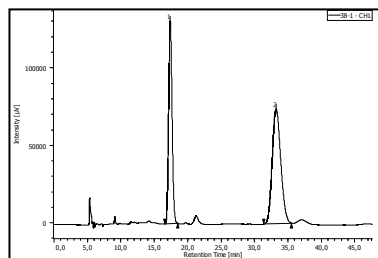

( $k_1 = 5.60$ ,  $\alpha = 1.75$   $R_s = 11.69$ )

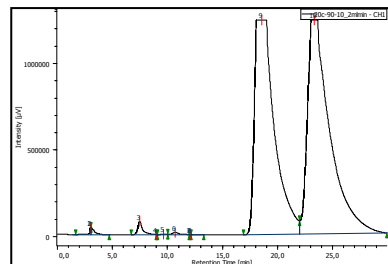

[a] Flow rate: 0.5 mL/min, loop 20  $\mu$ L, detection: 254 nm, column: Lux<sup>®</sup> 5  $\mu$ m Amylose-1, (250  $\times$  4.6 mm), mobile phase hexane:EtOH, 90:10.  $k$ : retention factor,  $\alpha$ : enantioselective selectivity,  $R_s$ : resolution index. [b] Flow rate: 2 mL/min, loop 200  $\mu$ L, loading ca. 1.5 mg/mL in hexane:EtOH (50:50), detection 254 nm, column: amylose tris-3,5-dimethylphenylcarbamate coated with Nucleosil (200 mm  $\times$  7 mm); mobile phase hexane:EtOH, 90:10.

**Table S2.** Elution order, specific rotation, and enantiomeric excess ( $e.r$ ) of the resolved compound **22**, **23**, and **26** enantiomers.

| Enantiomer | Elution order | $[\alpha]_D$ (c) <sup>a</sup> | <i>e.r.</i> (%) <sup>b</sup> |
|------------|---------------|-------------------------------|------------------------------|
| (-)-22     | First order   | -0.06 (0.08)                  | >99:1                        |
| (+)-22     | Second order  | +0.04 (0.10)                  | >99:1                        |
| (-)-23     | First order   | -0.08 (0.05)                  | >99:1                        |
| (+)-23     | Second order  | +0.22 (0.12)                  | >99:1                        |
| (-)-26     | First order   | -0.16 (0.03)                  | 97:3                         |
| (+)-26     | Second order  | +0.15 (0.03)                  | >99:1                        |

[a] Specific rotation in MeOH with c = concentration in g/mL. [b] Enantiomeric ratio (*e.r.*) determined by enantioselective LC described in experimental conditions. Used as an expression of enantiomer purity, this ratio was normalized as a percent.

### 3. High resolution mass spectra

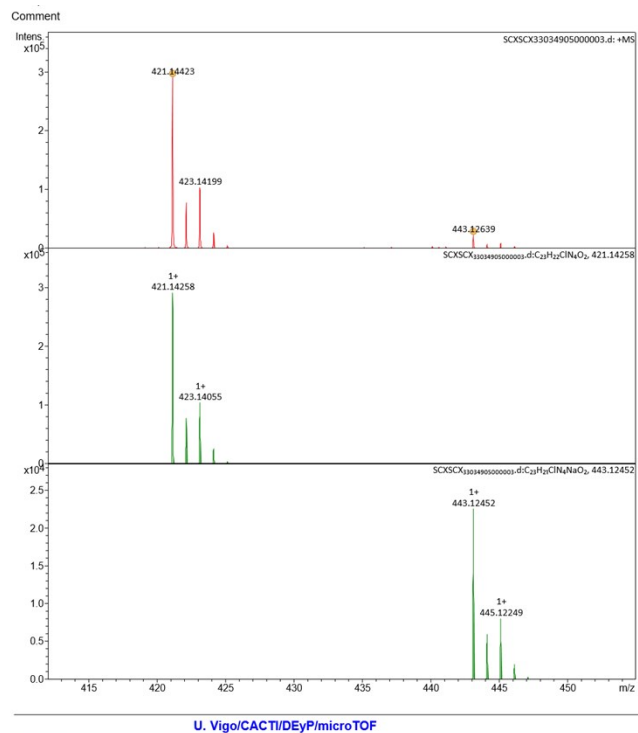

**Fig. S48:** Mass spectra of (1*S*,4*R*)-4-((1*H*-indol-3-yl)methyl)-8-chloro-1-isopropyl-1,2-dihydro-6*H*-pyrazino[2,1-*b*]quinazoline-3,6(4*H*)-dione (**22**). (20, 300v)

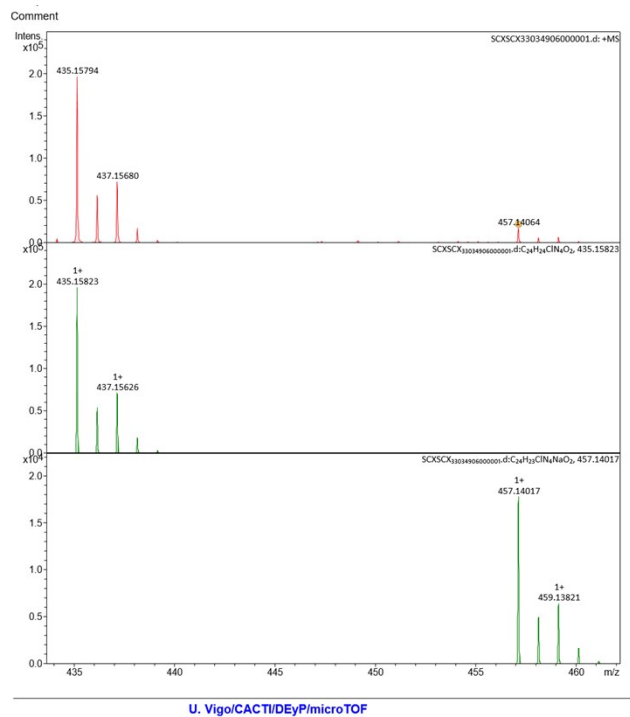

**Fig. S49:** Mass spectra of (1*S*,4*R*)-4-((1*H*-indol-3-yl)methyl)-8-chloro-1-isobutyl-1,2-dihydro-6*H*-pyrazino[2,1-*b*]quinazoline-3,6(4*H*)-dione (**23**). (20, 300v)

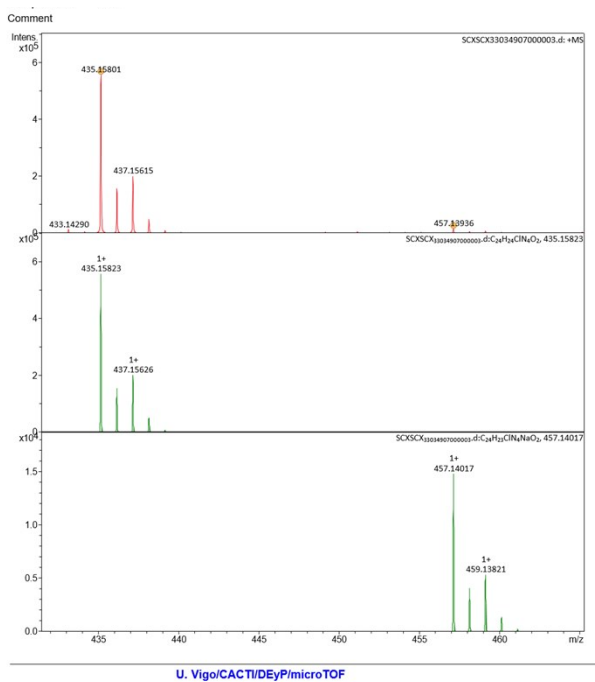

**Fig. S50:** Mass spectra of (1*S*,4*R*)-4-((1*H*-indol-3-yl)methyl)-1-((*S*)-sec-butyl)-8-chloro-1,2-dihydro-6*H*-pyrazino[2,1-*b*]quinazoline-3,6(4*H*)-dione (**24**). (20, 300v)

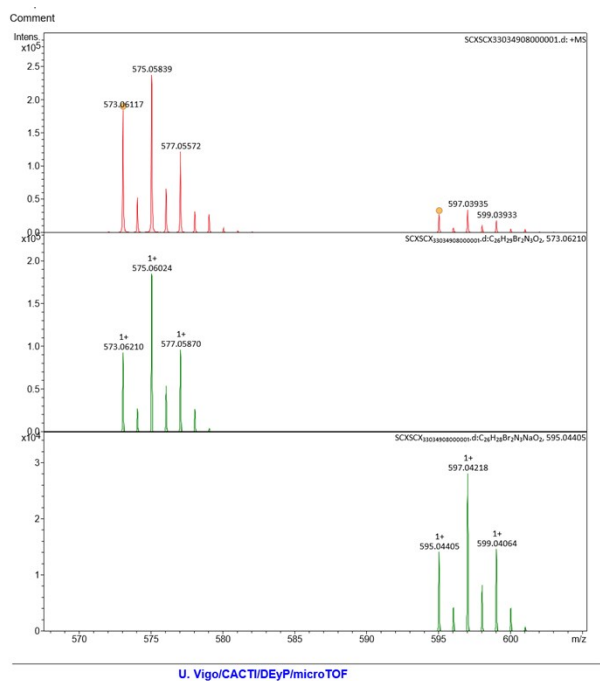

**Fig. S51:** Mass spectra of (1*S*,4*R*)-4-((1*H*-indol-3-yl)methyl)-8,10-dichloro-1-isopropyl-1,2-dihydro-6*H*-pyrazino[2,1-*b*]quinazoline-3,6(4*H*)-dione (**25**). (20, 300v)

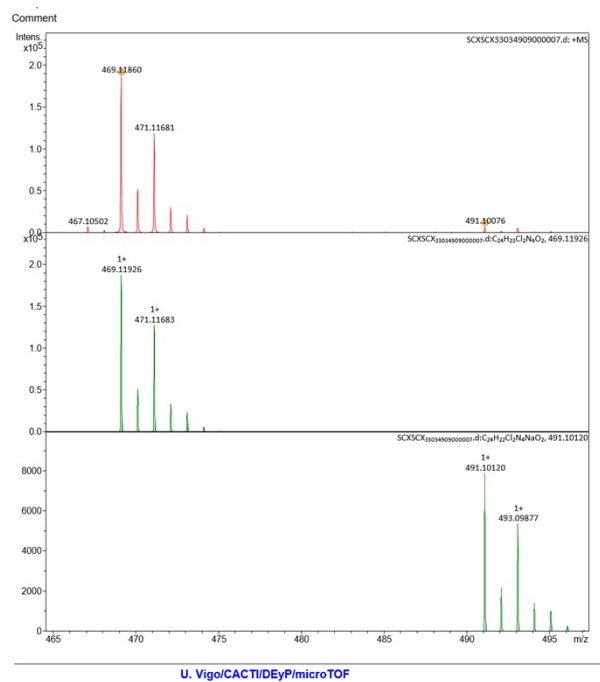

**Fig. S52:** Mass spectra of (1*S*,4*R*)-4-((1*H*-indol-3-yl)methyl)-8,10-dichloro-1-isobutyl-1,2-dihydro-6*H*-pyrazino[2,1-*b*]quinazoline-3,6(4*H*)-dione (**26**). (20, 300v)

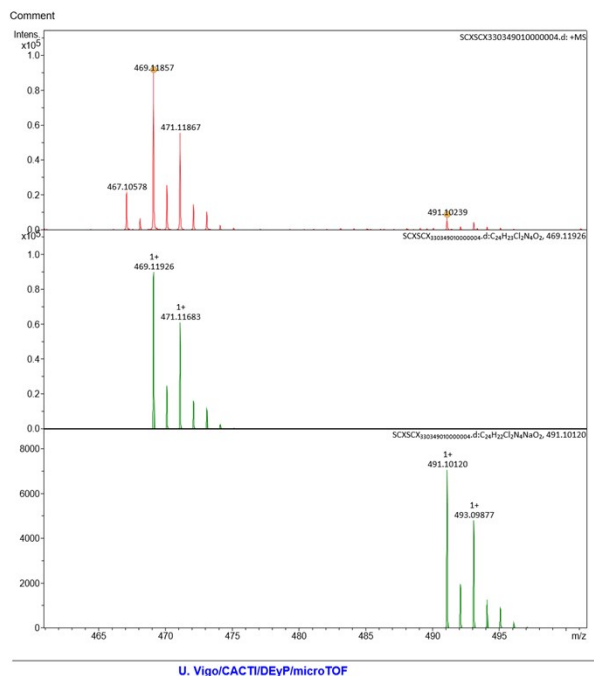

**Fig.S53:** Mass spectra of (1*S*,4*R*)-4-((1*H*-indol-3-yl)methyl)-1-((*S*)-sec-butyl)-8,10-dichloro-1,2-dihydro-6*H*-pyrazino[2,1-*b*]quinazoline-3,6(4*H*)-dione (**27**). (20, 300v)

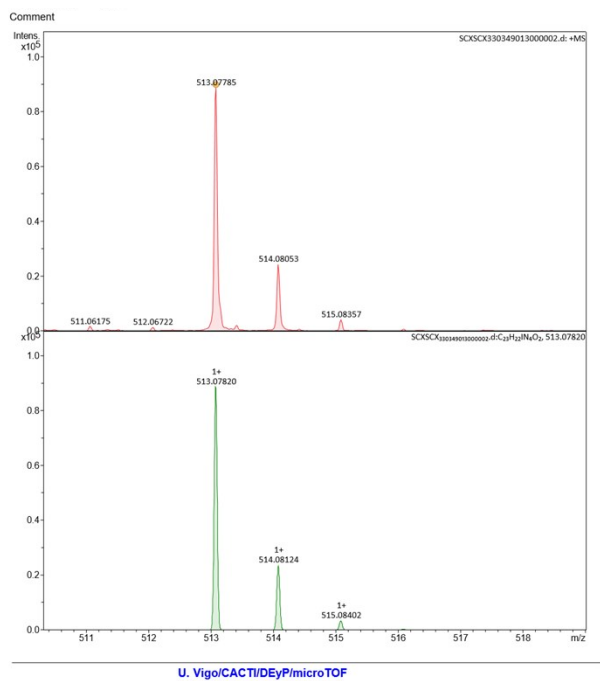

**Fig. S54:** Mass spectra of (1*S*,4*R*)-4-((1*H*-indol-3-yl)methyl)-8-iodo-1-isopropyl-1,2-dihydro-6*H*-pyrazino[2,1-*b*]quinazoline-3,6(4*H*)-dione (**28**). (20, 300v)

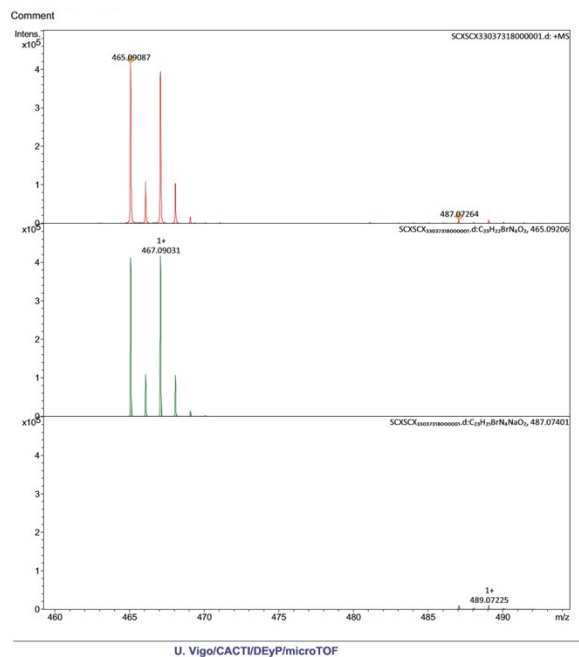

**Fig. S55.** Mass spectra of (1*S*,4*R*)-4-((1*H*-indol-3-yl)methyl)-8-bromo-1-isopropyl-1,2-dihydro-6*H*-pyrazino[2,1-*b*]quinazoline-3,6(4*H*)-dione (**29**). (20, 300v)

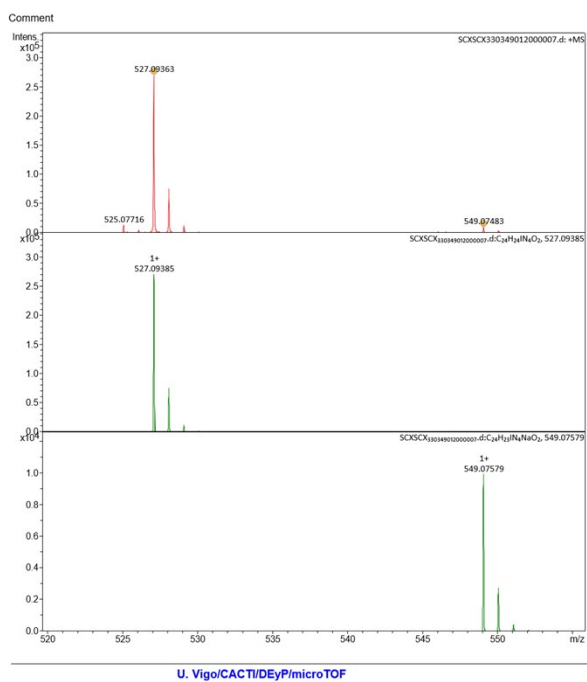

**Fig. S56:** Mass spectra of (1*S*,4*R*)-4-((1*H*-indol-3-yl)methyl)-8-iodo-1-isobutyl-1,2-dihydro-6*H*-pyrazino[2,1-*b*]quinazoline-3,6(4*H*)-dione (**30**). (20, 300v)



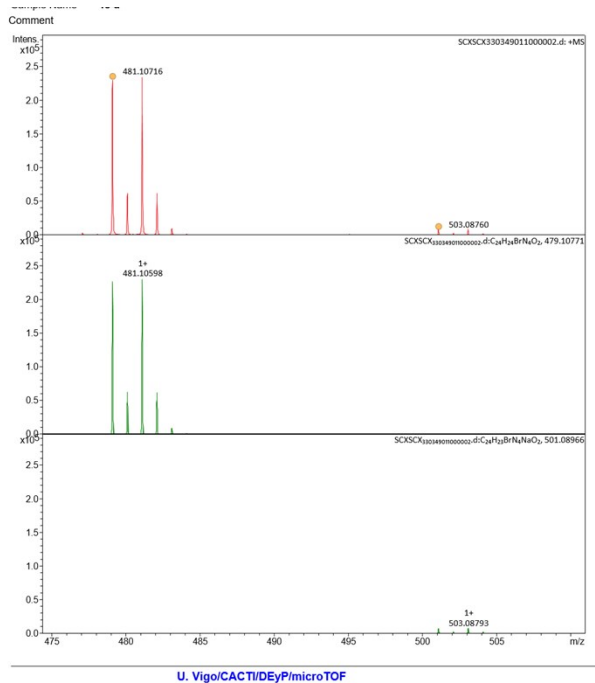

**Fig. S57:** Mass spectra of (1*S*,4*R*)-4-((1*H*-indol-3-yl)methyl)-8-bromo-1-isobutyl-1,2-dihydro-6*H*-pyrazino[2,1-*b*]quinazoline-3,6(4*H*)-dione (**31**). (20, 300v)

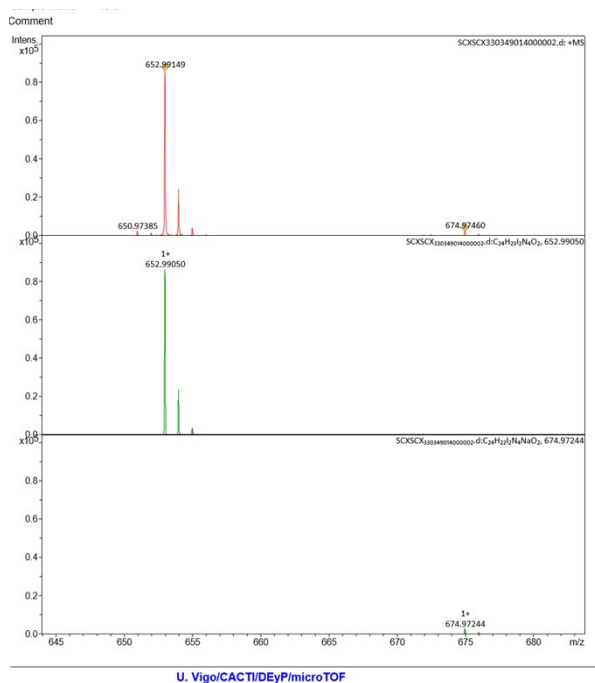

**Fig. S58:** Mass spectra of (1*S*,4*R*)-4-((1*H*-indol-3-yl)methyl)-8,10-diiodo-1-isobutyl-1,2-dihydro-6*H*-pyrazino[2,1-*b*]quinazoline-3,6(4*H*)-dione (**32**). (20, 300v)

#### 4. Antimicrobial activity

**Table S3.** Antibacterial activity of quinazolinones **5-32** on Gram-positive and Gram-negative sensitive strains. MIC and MBC are expressed in µg/mL. Inhibition halos are expressed in mm.

|               | Gram-positive                  |               |      |                                  |               |     | Gram-negative                |     |     |                                    |     |     |
|---------------|--------------------------------|---------------|------|----------------------------------|---------------|-----|------------------------------|-----|-----|------------------------------------|-----|-----|
|               | <i>S. aureus</i><br>ATCC 29213 |               |      | <i>E. faecalis</i><br>ATCC 29212 |               |     | <i>E. coli</i><br>ATCC 25922 |     |     | <i>P. aeruginosa</i><br>ATCC 27853 |     |     |
|               | Halo                           | MIC           | MBC  | Halo                             | MIC           | MBC | Halo                         | MIC | MBC | Halo                               | MIC | MBC |
| <b>5</b>      | 0                              | >64           | ND   | 0                                | >64           | ND  | 0                            | >64 | ND  | 0                                  | >64 | ND  |
| <b>6</b>      | 0                              | >64           | ND   | 0                                | >64           | ND  | 0                            | >64 | ND  | 0                                  | >64 | ND  |
| <b>7</b>      | 0                              | >64           | ND   | 0                                | >64           | ND  | 0                            | >64 | ND  | 0                                  | >64 | ND  |
| <b>8</b>      | 0                              | >64           | ND   | 0                                | >64           | ND  | 0                            | >64 | ND  | 0                                  | >64 | ND  |
| <b>9</b>      | 0                              | >64           | ND   | 0                                | >64           | ND  | 0                            | >64 | ND  | 0                                  | >64 | ND  |
| <b>10</b>     | 0                              | >64           | ND   | 0                                | >64           | ND  | 0                            | >64 | ND  | 0                                  | >64 | ND  |
| <b>11</b>     | 0                              | >64           | ND   | 0                                | >64           | ND  | 0                            | >64 | ND  | 0                                  | >64 | ND  |
| <b>12</b>     | 0                              | >64           | ND   | 0                                | >64           | ND  | 0                            | >64 | ND  | 0                                  | >64 | ND  |
| <b>13</b>     | 0                              | >64           | ND   | 0                                | >64           | ND  | 0                            | >64 | ND  | 0                                  | >64 | ND  |
| <b>14</b>     | 0                              | >64           | ND   | 0                                | >64           | ND  | 0                            | >64 | ND  | 0                                  | >64 | ND  |
| <b>15</b>     | 0                              | >64           | ND   | 0                                | >64           | ND  | 0                            | >64 | ND  | 0                                  | >64 | ND  |
| <b>16</b>     | 0                              | >64           | ND   | 0                                | >64           | ND  | 0                            | >64 | ND  | 0                                  | >64 | ND  |
| <b>17</b>     | 0                              | >64           | ND   | 0                                | >64           | ND  | 0                            | >64 | ND  | 0                                  | >64 | ND  |
| <b>18</b>     | 0                              | >64           | ND   | 0                                | >64           | ND  | 0                            | >64 | ND  | 0                                  | >64 | ND  |
| <b>19</b>     | 0                              | >64           | ND   | 0                                | >64           | ND  | 0                            | >64 | ND  | 0                                  | >64 | ND  |
| <b>20</b>     | 0                              | >64           | ND   | 0                                | >64           | ND  | 0                            | >64 | ND  | 0                                  | >64 | ND  |
| <b>21</b>     | 0                              | >64           | ND   | <b>9*</b>                        | >64           | ND  | 0                            | >64 | ND  | 0                                  | >64 | ND  |
| <b>22</b>     | <b>9</b>                       | <b>&gt;32</b> | > 64 | 0                                | >64           | >64 | 0                            | >64 | ND  | 0                                  | >64 | ND  |
| <b>(-)-22</b> | <b>9</b>                       | >64           | ND   | 0                                | >64           | ND  | 0                            | >64 | ND  | 0                                  | >64 | ND  |
| <b>(+)-22</b> | <b>9</b>                       | >64           | ND   | 0                                | >64           | ND  | 0                            | >64 | ND  | 0                                  | >64 | ND  |
| <b>23</b>     | <b>9</b>                       | <b>&gt;32</b> | > 64 | 0                                | <b>&gt;32</b> | >64 | 0                            | >64 | ND  | 0                                  | >64 | ND  |
| <b>(+)-23</b> | <b>10</b>                      | >64           | ND   | 0                                | >64           | ND  | 0                            | >64 | ND  | 0                                  | >64 | ND  |
| <b>24</b>     | <b>9</b>                       | <b>&gt;16</b> | > 64 | 0                                | <b>&gt;32</b> | >64 | 0                            | >64 | ND  | 0                                  | >64 | ND  |
| <b>25</b>     | <b>11</b>                      | <b>&gt;16</b> | > 64 | <b>9.5*</b>                      | >64           | ND  | <b>8*</b>                    | >64 | ND  | 0                                  | >64 | ND  |
| <b>26</b>     | <b>11</b>                      | <b>&gt;4</b>  | > 64 | <b>11*</b>                       | >64           | ND  | <b>8*</b>                    | >64 | ND  | 0                                  | >64 | ND  |
| <b>(-)-26</b> | <b>11</b>                      | <b>&gt;4</b>  | >64  | <b>9</b>                         | >64           | ND  | 0                            | >64 | ND  | 0                                  | ND  | ND  |
| <b>(+)-26</b> | <b>11</b>                      | >64           | ND   | <b>8.5</b>                       | >64           | ND  | 0                            | >64 | ND  | 0                                  | ND  | ND  |
| <b>27</b>     | <b>10</b>                      | <b>&gt;4</b>  | > 64 | <b>10*</b>                       | >64           | ND  | <b>8*</b>                    | >64 | ND  | 0                                  | >64 | ND  |
| <b>28</b>     | <b>9*</b>                      | > 64          | ND   | 0                                | >64           | ND  | <b>8.5*</b>                  | >64 | ND  | <b>8.5*</b>                        | >64 | ND  |
| <b>29</b>     | 0                              | > 64          | ND   | 0                                | >64           | ND  | 0                            | >64 | ND  | <b>8.5*</b>                        | >64 | ND  |
| <b>30</b>     | <b>9.5</b>                     | <b>&gt;16</b> | > 64 | <b>9.5*</b>                      | >64           | ND  | <b>8</b>                     | >64 | ND  | 0                                  | >64 | ND  |
| <b>31</b>     | <b>9.5</b>                     | <b>&gt;16</b> | > 64 | <b>10*</b>                       | >64           | ND  | <b>8</b>                     | >64 | ND  | 0                                  | >64 | ND  |
| <b>32</b>     | <b>9</b>                       | > 64          | ND   | <b>11*</b>                       | >64           | ND  | 0                            | >64 | ND  | 0                                  | >64 | ND  |

MIC, minimum inhibitory concentration; MBC, minimum bactericidal concentration; \* halo of partial inhibition; ND, not determined

**Table S4.** Antibacterial activity of quinazolinones **5-32** on five different bacterial strains. MIC and MBC are expressed in µg/mL. Inhibition halos are expressed in mm.

|               | <i>S. aureus</i><br>66/1 (MRSA) |              |         | <i>S. aureus</i><br>40/61/24 |              |         | <i>E. faecalis</i><br>B3/101 (VRE) |         |         | <i>E. coli</i> SA/2 |         |         | <i>E. faecalis</i><br>A5/102 (VRE) |         |         |
|---------------|---------------------------------|--------------|---------|------------------------------|--------------|---------|------------------------------------|---------|---------|---------------------|---------|---------|------------------------------------|---------|---------|
|               | Hal<br>o                        | MI<br>C      | MB<br>C | Hal<br>o                     | MI<br>C      | MB<br>C | Hal<br>o                           | MI<br>C | MB<br>C | Hal<br>o            | MI<br>C | MB<br>C | Hal<br>o                           | MI<br>C | MB<br>C |
| <b>5</b>      | 0                               | >64          | ND      | -                            | -            | -       | 0                                  | >64     | ND      | 0                   | >64     | ND      | -                                  | -       | -       |
| <b>6</b>      | 0                               | >64          | ND      | -                            | -            | -       | 0                                  | >64     | ND      | 0                   | >64     | ND      | -                                  | -       | -       |
| <b>7</b>      | 0                               | >64          | ND      | -                            | -            | -       | 0                                  | >64     | ND      | 0                   | >64     | ND      | -                                  | -       | -       |
| <b>8</b>      | 0                               | >64          | ND      | -                            | -            | -       | 0                                  | >64     | ND      | 0                   | >64     | ND      | -                                  | -       | -       |
| <b>9</b>      | 0                               | >64          | ND      | -                            | -            | -       | 0                                  | >64     | ND      | 0                   | >64     | ND      | -                                  | -       | -       |
| <b>10</b>     | 0                               | >64          | ND      | -                            | -            | -       | 0                                  | >64     | ND      | 0                   | >64     | ND      | -                                  | -       | -       |
| <b>11</b>     | 0                               | >64          | ND      | -                            | -            | -       | 0                                  | >64     | ND      | 0                   | >64     | ND      | -                                  | -       | -       |
| <b>12</b>     | 0                               | >64          | ND      | -                            | -            | -       | 0                                  | >64     | ND      | 0                   | >64     | ND      | -                                  | -       | -       |
| <b>13</b>     | 0                               | >64          | ND      | -                            | -            | -       | <b>7</b>                           | >64     | ND      | <b>7</b>            | >64     | ND      | -                                  | -       | -       |
| <b>14</b>     | 0                               | >64          | ND      | -                            | -            | -       | <b>8</b>                           | >64     | ND      | 0                   | >64     | ND      | -                                  | -       | -       |
| <b>15</b>     | 0                               | >64          | ND      | -                            | -            | -       | <b>8</b>                           | >64     | ND      | 0                   | >64     | ND      | -                                  | -       | -       |
| <b>16</b>     | 0                               | >64          | ND      | -                            | -            | -       | <b>8</b>                           | >64     | ND      | 0                   | >64     | ND      | -                                  | -       | -       |
| <b>17</b>     | 0                               | >64          | ND      | -                            | -            | -       | 0                                  | >64     | ND      | 0                   | >64     | ND      | -                                  | -       | -       |
| <b>18</b>     | 0                               | >64          | ND      | -                            | -            | -       | 0                                  | >64     | ND      | 0                   | >64     | ND      | -                                  | -       | -       |
| <b>19</b>     | 0                               | >64          | ND      | -                            | -            | -       | 0                                  | >64     | ND      | 0                   | >64     | ND      | -                                  | -       | -       |
| <b>20</b>     | 0                               | >64          | ND      | -                            | -            | -       | 0                                  | >64     | ND      | 0                   | >64     | ND      | -                                  | -       | -       |
| <b>21</b>     | 0                               | >64          | ND      | -                            | -            | -       | 0                                  | >64     | ND      | 0                   | >64     | ND      | -                                  | -       | -       |
| <b>22</b>     | 0                               | >64          | ND      | ND                           | 64           | >64     | <b>9</b>                           | >64     | ND      | <b>7</b>            | ND      | ND      | ND                                 | >64     | >64     |
| <b>(-)-22</b> | <b>9</b>                        | ND           | ND      | -                            | -            | -       | 0                                  | ND      | ND      | 0                   | ND      | ND      | -                                  | -       | -       |
| <b>(+)-22</b> | <b>9</b>                        | ND           | ND      | -                            | -            | -       | 0                                  | ND      | ND      | 0                   | ND      | ND      | -                                  | -       | -       |
| <b>23</b>     | 0                               | >64          | ND      | ND                           | 64           | >64     | <b>8</b>                           | >64     | ND      | <b>7</b>            | ND      | ND      | ND                                 | >64     | >64     |
| <b>(+)-23</b> | 0                               | ND           | ND      | -                            | -            | -       | 0                                  | ND      | ND      | 0                   | ND      | ND      | -                                  | -       | -       |
| <b>24</b>     | <b>9</b>                        | >64          | ND      | ND                           | 64           | >64     | <b>8</b>                           | >64     | ND      | <b>7</b>            | ND      | ND      | ND                                 | >64     | >64     |
| <b>25</b>     | <b>10</b>                       | >64          | ND      | ND                           | >64          | ND      | 0                                  | ND      | ND      | 0                   | ND      | ND      | ND                                 | ND      | ND      |
| <b>26</b>     | <b>10</b>                       | <b>&gt;8</b> | >64     | ND                           | <b>&gt;8</b> | >64     | 0                                  | ND      | ND      | 0                   | ND      | ND      | ND                                 | ND      | ND      |
| <b>(-)-26</b> | 0                               | <b>&gt;4</b> | >64     | ND                           | <b>&gt;4</b> | >64     | 0                                  | ND      | ND      | 0                   | ND      | ND      | ND                                 | ND      | ND      |
| <b>(+)-26</b> | 0                               | ND           | ND      | -                            | -            | -       | 0                                  | ND      | ND      | 0                   | ND      | ND      | -                                  | -       | -       |
| <b>27</b>     | <b>9.5</b>                      | <b>&gt;8</b> | >64     | ND                           | <b>&gt;8</b> | >64     | 0                                  | ND      | ND      | <b>9</b>            | ND      | ND      | ND                                 | ND      | ND      |
| <b>28</b>     | <b>10</b>                       | ND           | ND      | -                            | -            | -       | 0                                  | ND      | ND      | 0                   | ND      | ND      | -                                  | -       | -       |
| <b>29</b>     | 0                               | ND           | ND      | -                            | -            | -       | 0                                  | ND      | ND      | 0                   | ND      | ND      | -                                  | -       | -       |
| <b>30</b>     | <b>9*</b>                       | >64          | ND      | ND                           | 64           | >64     | 0                                  | ND      | ND      | 0                   | ND      | ND      | ND                                 | ND      | ND      |
| <b>31</b>     | <b>10*</b>                      | >64          | ND      | ND                           | >64          | ND      | 0                                  | ND      | ND      | <b>8.5</b>          | ND      | ND      | ND                                 | ND      | ND      |
| <b>32</b>     | 0                               | ND           | ND      | -                            | -            | -       | 0                                  | ND      | ND      | 0                   | ND      | ND      | -                                  | -       | -       |

MIC, minimum inhibitory concentration; MBC, minimum bactericidal concentration; \* halo of partial inhibition; ND, not determined

**Table S5.** Antifungal activity of quinazolines **5-32** against a panel of yeast and filamentous fungi. MIC and MFC are expressed in  $\mu\text{g/mL}$ .

|               | <i>C. albicans</i><br>ATCC 10231 |     | <i>A. fumigatus</i><br>ATCC 46645 |     | <i>T. rubrum</i> FF5 |      | <i>M. canis</i> FF1 |     | <i>E. floccosum</i><br>FF9 |     |
|---------------|----------------------------------|-----|-----------------------------------|-----|----------------------|------|---------------------|-----|----------------------------|-----|
|               | MIC                              | MFC | MIC                               | MFC | MIC                  | MFC  | MIC                 | MFC | MIC                        | MFC |
| <b>5</b>      | > 128                            | ND  | > 128                             | ND  | > 128                | ND   | <b>ND</b>           | ND  | ND                         | ND  |
| <b>6</b>      | > 128                            | ND  | > 128                             | ND  | > 128                | ND   | ND                  | ND  | ND                         | ND  |
| <b>7</b>      | > 128                            | ND  | > 128                             | ND  | > 128                | ND   | ND                  | ND  | ND                         | ND  |
| <b>8</b>      | > 128                            | ND  | > 128                             | ND  | > 128                | ND   | ND                  | ND  | ND                         | ND  |
| <b>9</b>      | > 128                            | ND  | > 128                             | ND  | > 128                | ND   | ND                  | ND  | ND                         | ND  |
| <b>10</b>     | > 128                            | ND  | > 128                             | ND  | > 128                | ND   | ND                  | ND  | ND                         | ND  |
| <b>11</b>     | > 128                            | ND  | > 128                             | ND  | > 128                | ND   | ND                  | ND  | ND                         | ND  |
| <b>12</b>     | > 128                            | ND  | > 128                             | ND  | > 128                | ND   | ND                  | ND  | ND                         | ND  |
| <b>13</b>     | > 128                            | ND  | > 128                             | ND  | > 128                | ND   | ND                  | ND  | ND                         | ND  |
| <b>14</b>     | > 128                            | ND  | > 128                             | ND  | > 128                | ND   | ND                  | ND  | ND                         | ND  |
| <b>15</b>     | > 128                            | ND  | > 128                             | ND  | > 128                | ND   | ND                  | ND  | ND                         | ND  |
| <b>16</b>     | > 128                            | ND  | > 128                             | ND  | > 128                | ND   | ND                  | ND  | ND                         | ND  |
| <b>17</b>     | > 128                            | ND  | > 128                             | ND  | > 128                | ND   | ND                  | ND  | ND                         | ND  |
| <b>18</b>     | > 128                            | ND  | > 128                             | ND  | > 128                | ND   | ND                  | ND  | ND                         | ND  |
| <b>19</b>     | > 128                            | ND  | > 128                             | ND  | > 128                | ND   | ND                  | ND  | ND                         | ND  |
| <b>20</b>     | > 128                            | ND  | > 128                             | ND  | > 128                | ND   | ND                  | ND  | ND                         | ND  |
| <b>21</b>     | > 128                            | ND  | > 128                             | ND  | > 128                | ND   | ND                  | ND  | ND                         | ND  |
| <b>22</b>     | > 128                            | ND  | > 128                             | ND  | > 128                | ND   | ND                  | ND  | ND                         | ND  |
| <b>(-)-22</b> | > 128                            | ND  | > 128                             | ND  | > 128                | ND   | ND                  | ND  | ND                         | ND  |
| <b>(+)-22</b> | > 128                            | ND  | > 128                             | ND  | > 128                | ND   | ND                  | ND  | ND                         | ND  |
| <b>23</b>     | > 128                            | ND  | > 128                             | ND  | > 128                | ND   | ND                  | ND  | ND                         | ND  |
| <b>(+)-23</b> | > 128                            | ND  | > 128                             | ND  | > 128                | ND   | ND                  | ND  | ND                         | ND  |
| <b>24</b>     | > 128                            | ND  | > 128                             | ND  | > 128                | ND   | ND                  | ND  | ND                         | ND  |
| <b>25</b>     | > 128                            | ND  | > 128                             | ND  | > 128                | ND   | ND                  | ND  | ND                         | ND  |
| <b>26</b>     | > 128                            | ND  | > 128                             | ND  | <b>128</b>           | >128 | >128                | ND  | >128                       | ND  |
| <b>(-)-26</b> | >128                             | ND  | >128                              | ND  | >128                 | ND   | ND                  | ND  | ND                         | ND  |
| <b>(+)-26</b> | >128                             | ND  | >128                              | ND  | >128                 | ND   | ND                  | ND  | ND                         | ND  |
| <b>27</b>     | > 128                            | ND  | > 128                             | ND  | > 128                | ND   | ND                  | ND  | ND                         | ND  |
| <b>28</b>     | > 128                            | ND  | > 128                             | ND  | <b>128</b>           | >128 | >128                | ND  | >128                       | ND  |
| <b>29</b>     | > 128                            | ND  | > 128                             | ND  | <b>128</b>           | >128 | >128                | ND  | >128                       | ND  |
| <b>30</b>     | > 128                            | ND  | > 128                             | ND  | > 128                | ND   | ND                  | ND  | ND                         | ND  |
| <b>31</b>     | > 128                            | ND  | > 128                             | ND  | > 128                | ND   | ND                  | ND  | ND                         | ND  |
| <b>32</b>     | > 128                            | ND  | > 128                             | ND  | > 128                | ND   | ND                  | ND  | ND                         | ND  |

MIC, minimum inhibitory concentration; MFC, minimum fungicidal concentration; ND, not determined

**Table S6:** Calculated molecular properties of compounds 5-32.

| Comp. | MW <sup>a</sup> | LOP <sup>b</sup> | TPSA (Å <sup>2</sup> ) <sup>c</sup> | nON <sup>d</sup> | nONNH <sup>e</sup> | nrotb <sup>f</sup> | LIP <sup>g</sup> | PK <sup>h</sup> |     |      |        |         |        |        |        |            | BIAS <sup>i</sup> | WatS <sup>j</sup> |
|-------|-----------------|------------------|-------------------------------------|------------------|--------------------|--------------------|------------------|-----------------|-----|------|--------|---------|--------|--------|--------|------------|-------------------|-------------------|
|       |                 |                  |                                     |                  |                    |                    |                  | Glab            | BBB | P-gp | CYP1A2 | CYP2C19 | CYP2C9 | CYP2D6 | CYP3A4 | Log Kp     |                   |                   |
| 5     | 386.45          | 3.1              | 79.78                               | 3                | 2                  | 3                  | Yes              | High            | No  | Yes  | No     | Yes     | Yes    | Yes    | Yes    | -6.02 cm/s | 0.55              | Moderate          |
| 6     | 386.45          | 3.11             | 79.78                               | 3                | 2                  | 3                  | Yes              | High            | No  | Yes  | No     | Yes     | Yes    | Yes    | Yes    | -6.02 cm/s | 0.55              | Moderate          |
| 7     | 386.45          | 3.1              | 79.78                               | 3                | 2                  | 3                  | Yes              | High            | No  | Yes  | No     | Yes     | Yes    | Yes    | Yes    | -6.02 cm/s | 0.55              | Moderate          |
| 8     | 386.45          | 3.11             | 79.78                               | 3                | 2                  | 3                  | Yes              | High            | No  | Yes  | No     | Yes     | Yes    | Yes    | Yes    | -6.02 cm/s | 0.55              | Moderate          |
| 9     | 400.47          | 3.38             | 79.78                               | 3                | 2                  | 4                  | Yes              | High            | No  | Yes  | No     | Yes     | Yes    | Yes    | Yes    | -5.86 cm/s | 0.55              | Moderate          |
| 10    | 400.47          | 3.41             | 79.78                               | 3                | 2                  | 4                  | YEs              | High            | No  | Yes  | No     | Yes     | Yes    | Yes    | Yes    | -5.86 cm/s | 0.55              | Moderate          |
| 11    | 400.47          | 3.42             | 79.78                               | 3                | 2                  | 4                  | Yes              | High            | No  | Yes  | No     | Yes     | Yes    | Yes    | Yes    | -5.86 cm/s | 0.55              | Moderate          |
| 12    | 400.47          | 3.41             | 79.78                               | 3                | 2                  | 4                  | Yes              | High            | No  | Yes  | No     | Yes     | Yes    | Yes    | Yes    | -5.86 cm/s | 0.55              | Moderate          |
| 13    | 400.47          | 3.43             | 79.78                               | 3                | 2                  | 4                  | Yes              | High            | No  | Yes  | No     | Yes     | Yes    | Yes    | Yes    | -5.73 cm/s | 0.55              | Moderate          |
| 14    | 400.47          | 2.43             | 79.78                               | 3                | 2                  | 4                  | Yes              | High            | No  | Yes  | No     | Yes     | Yes    | Yes    | Yes    | -5.73 cm/s | 0.55              | Moderate          |
| 15    | 418.51          | 3.07             | 105.08                              | 3                | 2                  | 5                  | Yes              | High            | No  | Yes  | No     | Yes     | Yes    | Yes    | Yes    | -6.45 cm/s | 0.55              | Moderate          |
| 16    | 418.51          | 3.1              | 105.08                              | 3                | 2                  | 5                  | Yes              | High            | No  | Yes  | No     | Yes     | Yes    | Yes    | Yes    | -6.45 cm/s | 0.55              | Moderate          |
| 17    | 540.61          | 4.85             | 89.01                               | 4                | 2                  | 7                  | Yes*             | High            | No  | No   | Yes    | No      | Yes    | No     | Yes    | -5.48 cm/s | 0.55              | Insoluble         |
| 18    | 540.61          | 4.83             | 89.01                               | 4                | 2                  | 7                  | Yes*             | High            | No  | No   | Yes    | No      | Yes    | No     | Yes    | -5.48 cm/s | 0.55              | Insoluble         |
| 19    | 450.49          | 3.23             | 100.01                              | 4                | 3                  | 4                  | Yes              | High            | No  | Yes  | No     | Yes     | Yes    | Yes    | No     | -6.22 cm/s | 0.55              | Moderate          |
| 20    | 450.49          | 3.27             | 100.01                              | 4                | 3                  | 4                  | Yes              | High            | No  | Yes  | No     | Yes     | Yes    | Yes    | No     | -6.22 cm/s | 0.55              | Moderate          |
| 21    | 358.39          | 2.55             | 79.78                               | 3                | 2                  | 2                  | Yes              | High            | No  | Yes  | No     | Yes     | Yes    | Yes    | No     | -6.42 cm/s | 0.55              | Moderate          |
| 22    | 420.89          | 3.63             | 79.78                               | 3                | 2                  | 3                  | Yes              | High            | No  | Yes  | No     | Yes     | Yes    | No     | Yes    | -5.79 cm/s | 0.55              | Moderate          |
| 23    | 434.92          | 3.95             | 79.78                               | 3                | 2                  | 4                  | Yes              | High            | No  | Yes  | No     | Yes     | Yes    | No     | Yes    | -5.62 cm/s | 0.55              | Poor              |
| 24    | 434.92          | 3.99             | 79.78                               | 3                | 2                  | 4                  | Yes              | High            | No  | Yes  | No     | Yes     | Yes    | No     | Yes    | -5.49 cm/s | 0.55              | Poor              |

| Comp. | MW <sup>a</sup> | LOP <sup>b</sup> | TPSA (Å <sup>2</sup> ) <sup>c</sup> | nON <sup>d</sup> | nONNH <sup>e</sup> | nrotb <sup>f</sup> | LIP <sup>g</sup> | PK <sup>h</sup> |    |     |    |     |     |    |     |               | BiAS <sup>i</sup> | WatS <sup>j</sup> |
|-------|-----------------|------------------|-------------------------------------|------------------|--------------------|--------------------|------------------|-----------------|----|-----|----|-----|-----|----|-----|---------------|-------------------|-------------------|
|       |                 |                  |                                     |                  |                    |                    |                  | High            | No | Yes | No | Yes | Yes | No | Yes | -5.56<br>cm/s |                   |                   |
| 25    | 434.92          | 4.12             | 79.78                               | 3                | 2                  | 3                  | Yes              | High            | No | Yes | No | Yes | Yes | No | Yes | -5.56<br>cm/s | 0.55              | Poor              |
| 26    | 469.36          | 4.44             | 79.78                               | 3                | 2                  | 4                  | Yes              | High            | No | Yes | No | Yes | Yes | No | Yes | -5.39<br>cm/s | 0.55              | Poor              |
| 27    | 469.36          | 4.5              | 79.78                               | 3                | 2                  | 4                  | Yes              | High            | No | Yes | No | Yes | Yes | No | Yes | -5.26<br>cm/s | 0.55              | Poor              |
| 28    | 512.34          | 3.75             | 79.78                               | 3                | 2                  | 3                  | Yes              | High            | No | Yes | No | Yes | Yes | No | Yes | -6.33<br>cm/s | 0.55              | Poor              |
| 29    | 465.34          | 3.72             | 79.78                               | 3                | 2                  | 3                  | Yes              | High            | No | Yes | No | Yes | Yes | No | Yes | -6.01<br>cm/s | 0.55              | Poor              |
| 30    | 526.37          | 4.06             | 79.78                               | 3                | 2                  | 4                  | Yes              | High            | No | Yes | No | Yes | Yes | No | Yes | -6.17<br>cm/s | 0.55              | Poor              |
| 31    | 479.37          | 4.04             | 79.78                               | 3                | 2                  | 4                  | Yes              | High            | No | Yes | No | Yes | Yes | No | Yes | -5.85<br>cm/s | 0.55              | Poor              |
| 32    | 652.27          | 4.68             | 79.78                               | 3                | 2                  | 4                  | No               | High            | No | Yes | No | Yes | Yes | No | No  | -6.47<br>cm/s | 0.55              | Poor              |

<sup>a</sup>MW =Molecular weight (g/mol)

<sup>b</sup> LOP = octanol-water partition coefficient (consensus log P<sub>o/w</sub>)

<sup>c</sup> TPSA = Topological polar surface area (Å<sup>2</sup>)

<sup>d</sup> nON = number of hydrogen bond acceptors

<sup>e</sup> nONNH = number of hydrogen bond donors

<sup>f</sup> nrotb = number of rotatable bonds

<sup>g</sup> LIP = Lipinski (\* yes with one violation)

<sup>h</sup> PK = Pharmacokinetics ( Glab = GI absorption, BBB = BBB permeant, P-gp = P-go substrate, CYP = CYP inhibitor, Long Kp (skin permeation))

<sup>i</sup> BiAS = Bioavailability score

<sup>j</sup> WatS = Water solubility (SILICOS-IT)

\*All calculation were obtained from Swiss Institute of Bioinformatic (SwissADME): available at <http://www.swissadme.ch/index.php> (accessed 6th march 2020)
